# Supplementary material for: Cancer cell membrane-camouflaged and H2O2-activatable nanocomposites for synergistic chemotherapy and two-photon photodynamic therapy against melanoma
Source: Royal Society of Chemistry journal article supplement (doi:10.1039/d3qi00414g), 2023-01-01
Supplement: d3qi00414g1.pdf [file d3qi00414g1.pdf]

## Supporting Information

### **Cancer cell membrane camouflaged and H<sub>2</sub>O<sub>2</sub>-activatable nanocomposites for synergistic chemotherapy and two-photon photodynamic therapy against melanoma**

Siyuan Gao,<sup>a</sup> Fangmian Wei,<sup>a</sup> Johannes Karges,<sup>b</sup> Yukun Zhao,<sup>\*c</sup> Liangnian Ji,<sup>a</sup> Hui Chao<sup>\*a,d</sup>

<sup>a</sup> MOE Key Laboratory of Bioinorganic and Synthetic Chemistry, School of Chemistry, Guangdong Provincial Key Laboratory of Digestive Cancer Research, The Seventh Affiliated Hospital, Sun Yat-Sen University, Guangzhou, 510006, P. R. China. E-mail: ceschh@mail.sysu.edu.cn

<sup>b</sup> Faculty of Chemistry and Biochemistry, Ruhr-University Bochum, Universitätsstrasse 150, 44780 Bochum, Germany.

<sup>c</sup> Department of Dermatology, The Eastern Division of the First Affiliated Hospital, Sun Yat-Sen University, Guangzhou, 510275, P. R. China. E-mail: zhaoyukun7288569@sina.com

<sup>d</sup> MOE Key Laboratory of Theoretical Organic Chemistry and Functional Molecule, School of Chemistry and Chemical Engineering, Hunan University of Science and Technology, Xiangtan, 400201, P. R. China.

## Table of Contents

|                                                                                                                               |    |
|-------------------------------------------------------------------------------------------------------------------------------|----|
| <b>Scheme S1.</b> Synthesis of <b>Ir@SeNPs</b>                                                                                | 3  |
| <b>Figure S1.</b> ESI-MS spectrum and HRMS spectrum of <b>Ir-OH</b>                                                           | 4  |
| <b>Figure S2.</b> ESI-MS spectrum and HRMS spectrum of <b>Ir-B(OH)<sub>2</sub></b>                                            | 5  |
| <b>Figure S3.</b> <sup>1</sup> H-NMR spectrum of <b>Ir-OH</b>                                                                 | 6  |
| <b>Figure S4.</b> <sup>1</sup> H-NMR spectrum of <b>Ir-B(OH)<sub>2</sub></b>                                                  | 7  |
| <b>Figure S5.</b> The purity of <b>Ir-OH</b> detected by LC-MS                                                                | 8  |
| <b>Figure S6.</b> The purity of <b>Ir-B(OH)<sub>2</sub></b> detected by LC-MS                                                 | 9  |
| <b>Figure S7.</b> The elemental mapping of <b>Ir@SeNPs</b>                                                                    | 10 |
| <b>Figure S8.</b> Size distribution of <b>SeNPs</b> , <b>Ir@SeNPs</b> , and <b>Ir@SeNPs@CC</b>                                | 11 |
| <b>Figure S9.</b> FTIR spectra of <b>SeNPs</b> , <b>Ir-OH</b> , <b>Ir-B(OH)<sub>2</sub></b> , and <b>Ir@SeNPs</b>             | 12 |
| <b>Figure S10.</b> Change in absorption of DPBF at 410 nm upon 405 nm light irradiation                                       | 13 |
| <b>Figure S11.</b> Change in absorption of DPBF at 410 nm upon 730 nm two-photon light irradiation                            | 14 |
| <b>Figure S12.</b> Hydrodynamic diameters of <b>Ir@SeNPs</b> and <b>Ir@SeNPs@CC</b> in common buffer                          | 15 |
| <b>Figure S13.</b> Changes in the absorption of <b>Ir@SeNPs</b> upon different treatments                                     | 16 |
| <b>Figure S14.</b> Release kinetics of <b>Ir@SeNPs</b> in different aqueous solution                                          | 17 |
| <b>Figure S15.</b> The ESI-MS of the supernatant of <b>Ir@SeNPs</b> solution after treated with H <sub>2</sub> O <sub>2</sub> | 18 |
| <b>Figure S16.</b> QM generation detected by <sup>1</sup> H-NMR                                                               | 19 |
| <b>Figure S17.</b> Degradation of H <sub>2</sub> O <sub>2</sub> after being treated with <b>Ir@SeNPs</b>                      | 20 |
| <b>Figure S18.</b> Intracellular H <sub>2</sub> O <sub>2</sub> levels of A375 cells upon different treatments                 | 21 |
| <b>Figure S19.</b> UV absorption of DTNB at 412 nm of time dependent GSH consumption                                          | 22 |
| <b>Figure S20.</b> Intracellular GSH level of A375 cells upon different treatments                                            | 23 |
| <b>Figure S21.</b> Cytotoxicity of A375 cells upon 20 mW light irradiation                                                    | 24 |
| <b>Figure S23.</b> Dark cytotoxicity of L02 cells                                                                             | 25 |
| <b>Figure S22.</b> Cytotoxicity of A549 cells, HepG2 cells and MCF-7 cells                                                    | 26 |
| <b>Figure S24.</b> Dark cytotoxicity of RAW 264.7 cells                                                                       | 27 |
| <b>Figure S25.</b> The DCF assay of A375 cells                                                                                | 28 |
| <b>Figure S26.</b> The JC-1 assay of A375 cells                                                                               | 29 |
| <b>Figure S27.</b> The Calcein AM/EthD-1 staining of monolayer A375 cells                                                     | 30 |
| <b>Figure S28.</b> Wound migration assays and western blot analysis                                                           | 31 |
| <b>Figure S29.</b> The Calcein AM/EthD-1 staining of A375 MCTS                                                                | 32 |
| <b>Figure S30</b> The fluorescence imaging of organs of A375 tumor-bearing mice                                               | 33 |
| <b>Figure S31.</b> Biodistribution in major organs                                                                            | 34 |
| <b>Figure S32.</b> Representative H&E stained histopathologic slices of the major organs and tumors                           | 35 |
| <b>Table S1.</b> Cytotoxicity towards different cell lines                                                                    | 36 |
| <b>Table S2.</b> Cytotoxicity towards A375 MCTS                                                                               | 37 |

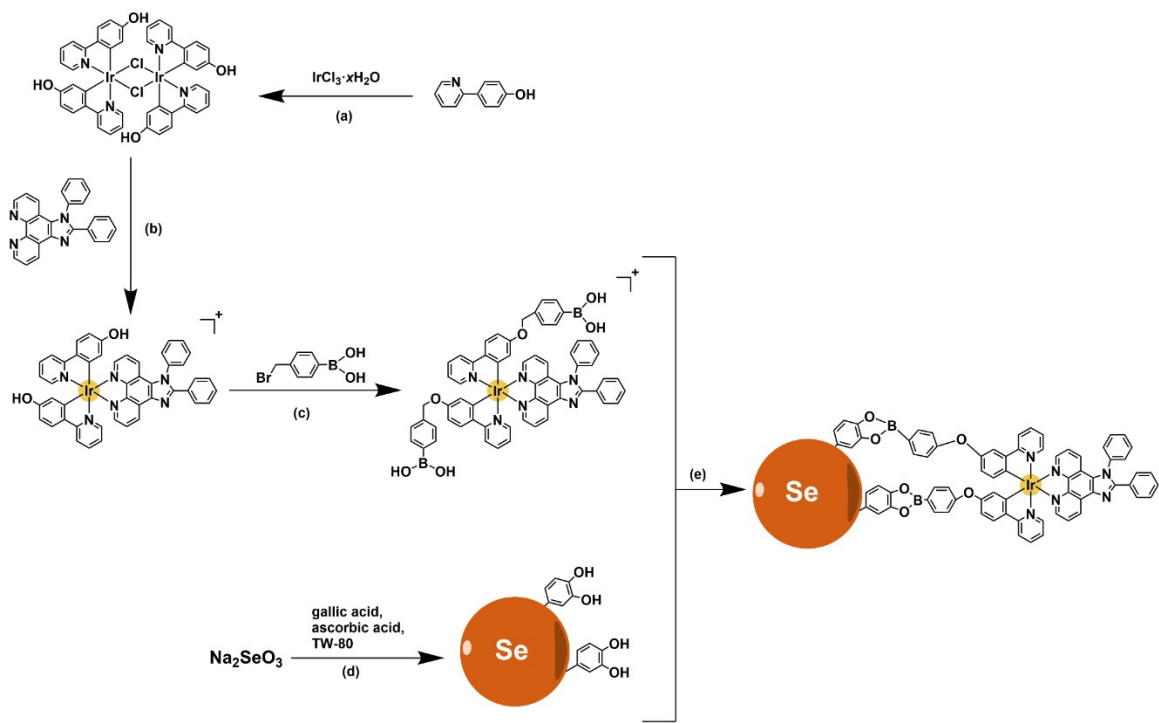

**Scheme S1.** Synthesis of  $\text{Ir-OH}$ ,  $\text{Ir-B(OH)}_2$ , and  $\text{Ir@SeNPs}$ . (a) 2-Ethoxyethano,  $\text{H}_2\text{O}$ , dark, Ar atmosphere,  $125^\circ\text{C}$ , 24 h; (b)  $\text{CH}_2\text{Cl}_2$ ,  $\text{CH}_3\text{OH}$ , dark, Ar atmosphere,  $65^\circ\text{C}$ , 12 h; (c)  $\text{K}_2\text{CO}_3$ , dry DMF,  $63^\circ\text{C}$ , 2h; (d)  $\text{H}_2\text{O}$ , room-temperature, overnight; (e) DMSO,  $\text{H}_2\text{O}$ ,  $37^\circ\text{C}$ , 48 h.

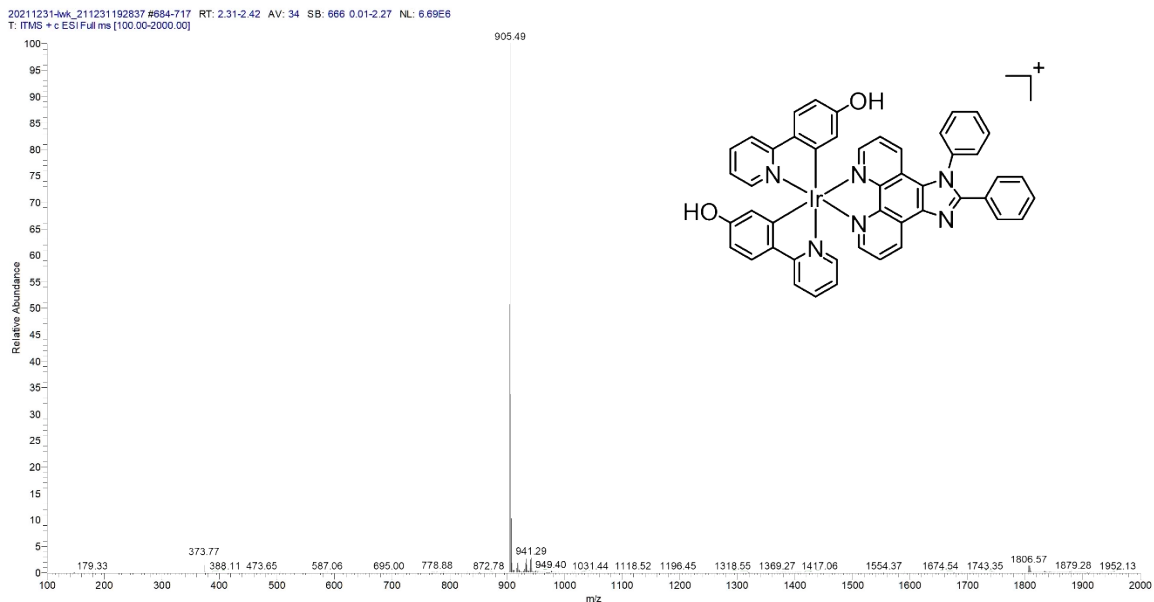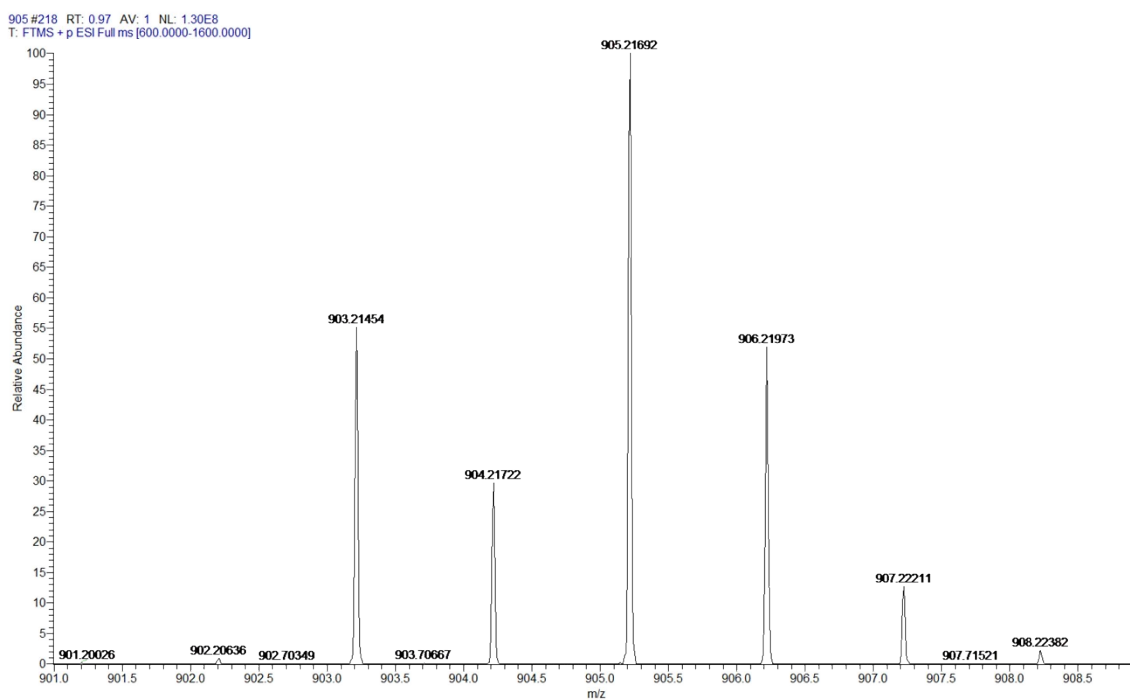

**Figure S1.** ESI-MS spectrum (top) and HRMS (bottom) spectrum of **Ir-OH**. HRMS,  $m/z = C_{47}H_{32}IrN_6O_2$ , 905.2216 [M]<sup>+</sup>, found, 905.2169 [M]<sup>+</sup>.

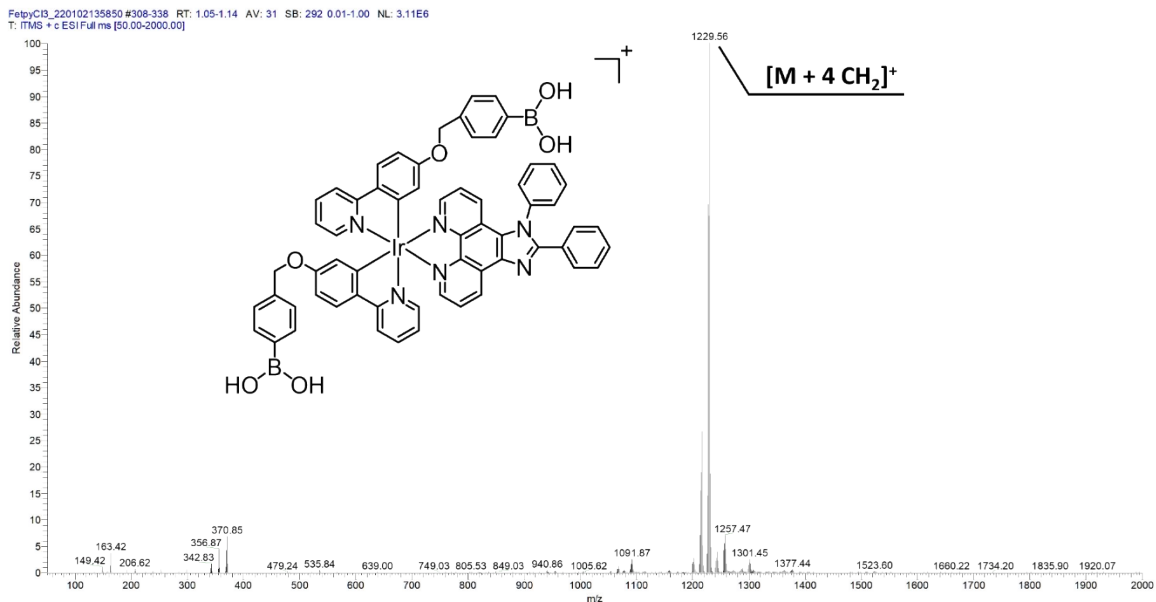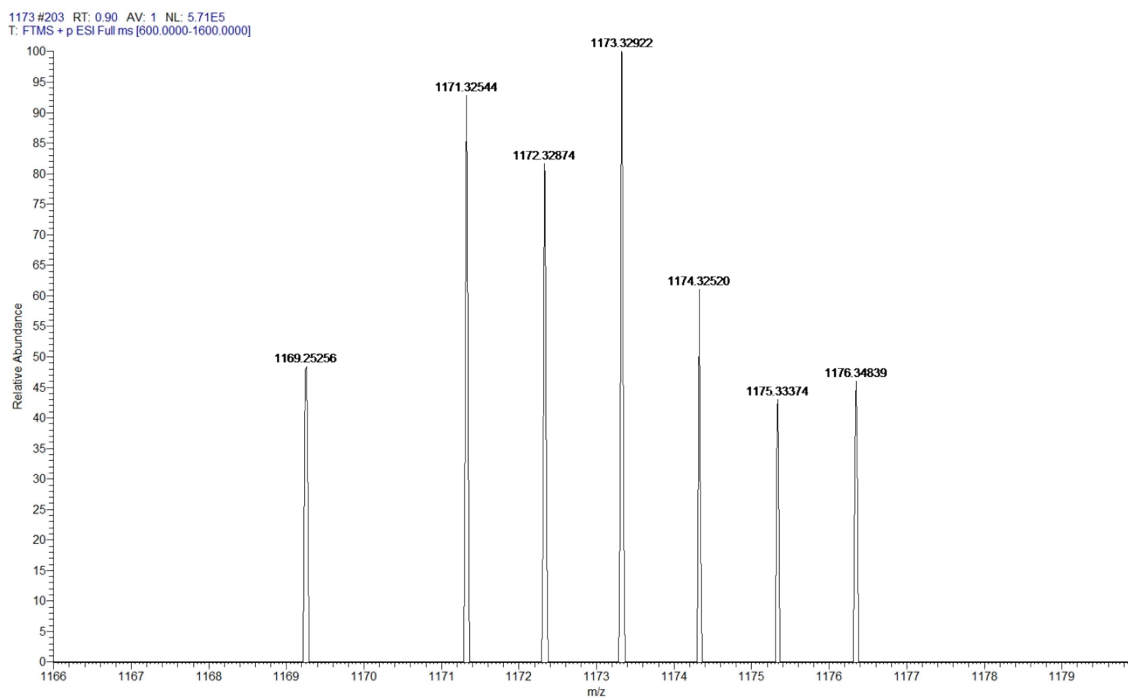

**Figure S2.** ESI-MS spectrum (top, tetra-methyl boronic ester form) and HRMS (bottom) spectrum of  $Ir-B(OH)_2$ . HRMS,  $m/z = C_{61}H_{46}B_2IrN_6O_6$ , 1173.3294  $[M]^+$ , found, 1173.3292  $[M]^+$ .

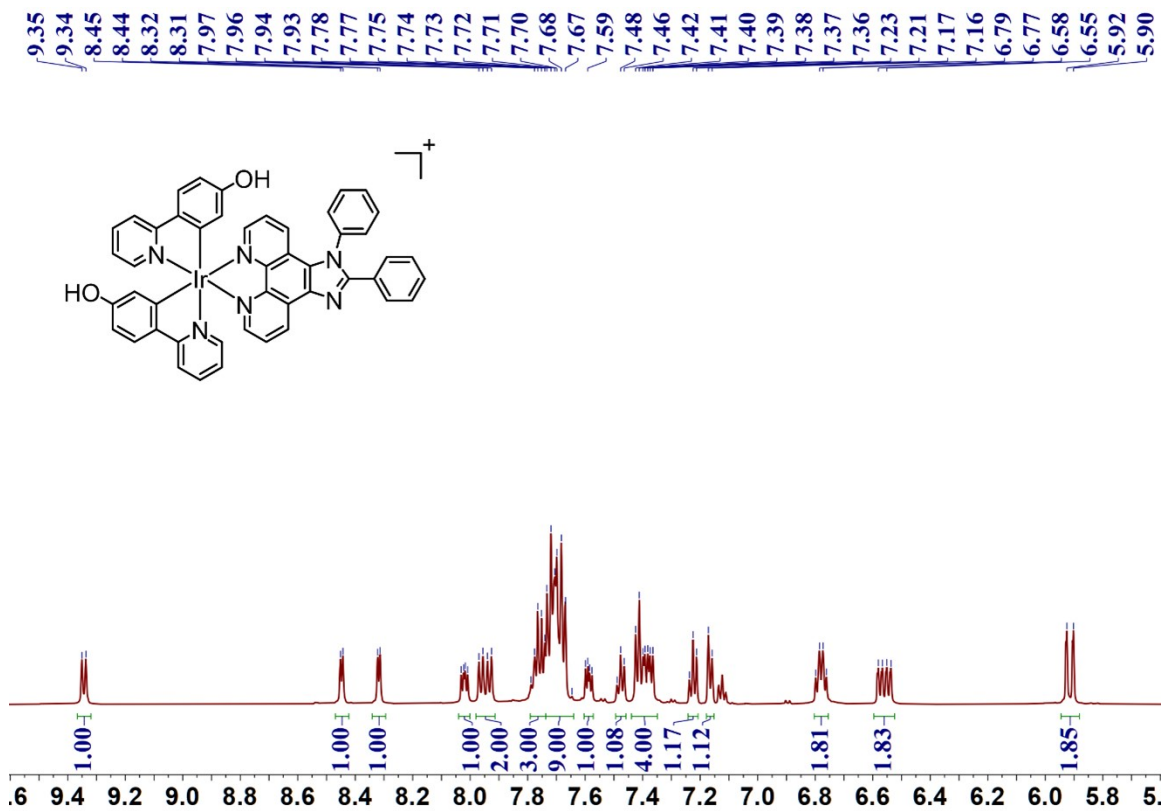

**Figure S3.** <sup>1</sup>H-NMR spectrum of Ir-OH. <sup>1</sup>H-NMR (600 MHz, Methanol-d<sub>4</sub>) δ 9.34 (d, *J* = 8.2 Hz, 1H), 8.45 (d, *J* = 5.1 Hz, 1H), 8.32 (d, *J* = 5.1 Hz, 1H), 8.02 (dd, *J* = 8.4, 5.1 Hz, 1H), 7.95 (m, 2H), 7.76 (p, *J* = 7.1, 6.7 Hz, 3H), 7.70 (m, 9H), 7.59 (dd, *J* = 8.7, 5.0 Hz, 1H), 7.48 (t, *J* = 7.4 Hz, 1H), 7.44 – 7.35 (m, 4H), 7.23 (t, *J* = 7.5 Hz, 1H), 7.17 (d, *J* = 7.5 Hz, 1H), 6.78 (m, 2H), 6.56 (m, 2H), 5.91 (d, 2H).

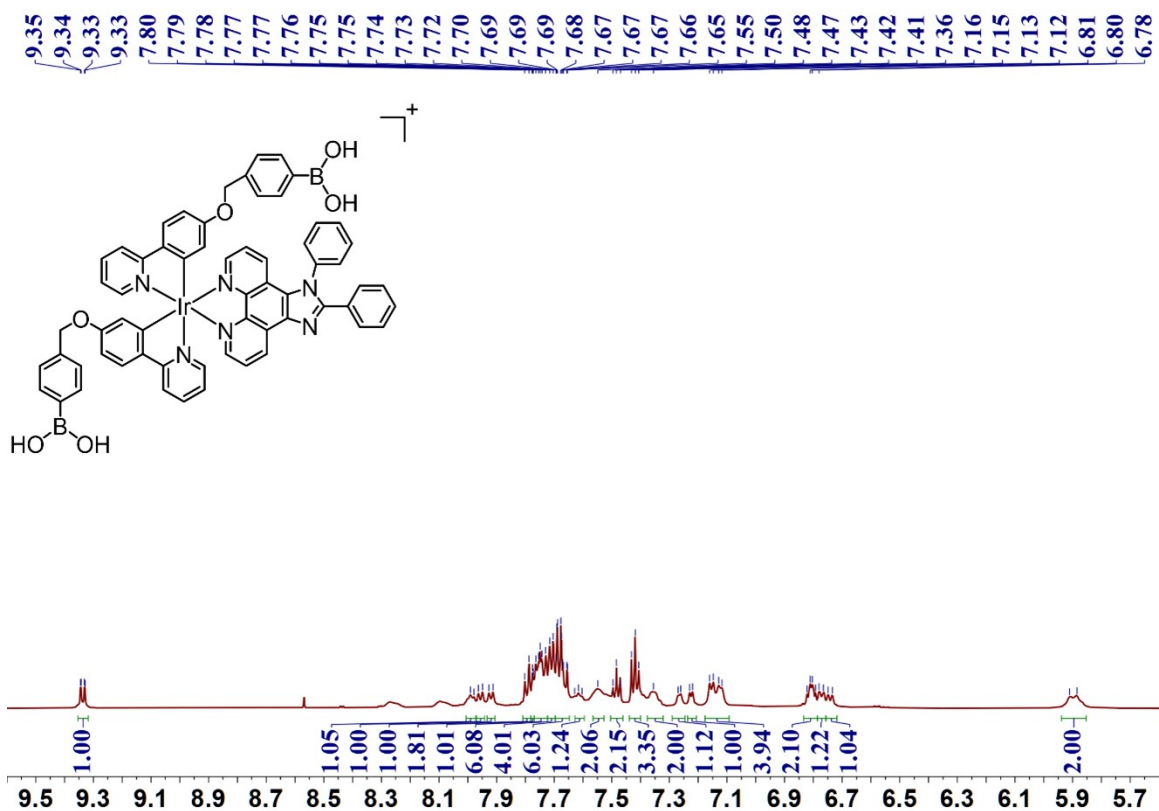

**Figure S4.**  $^1\text{H-NMR}$  spectrum of  $\text{Ir-B(OH)}_2$ .  $^1\text{H-NMR}$  (600 MHz, Methanol- $d_4$ )  $\delta$  9.34 (dd,  $J = 8.3, 1.5$  Hz, 1H), 7.98 (d,  $J = 7.4$  Hz, 1H), 7.96 (d,  $J = 8.3$  Hz, 1H), 7.92 (d,  $J = 8.2$  Hz, 1H), 7.79 (d,  $J = 8.8$  Hz, 2H), 7.77 (t,  $J = 1.5$  Hz, 1H), 7.77 – 7.72 (m, 6H), 7.71 (d,  $J = 7.1$  Hz, 4H), 7.67 (m, 6H), 7.61 (d,  $J = 7.5$  Hz, 1H), 7.55 (s, 2H), 7.50 – 7.46 (m, 2H), 7.42 (t,  $J = 7.6$  Hz, 3H), 7.36 (s, 2H), 7.27 (d,  $J = 5.8$  Hz, 1H), 7.22 (d,  $J = 5.9$  Hz, 1H), 7.14 (m, 4H), 6.81 (t,  $J = 5.6$  Hz, 2H), 6.77 (d,  $J = 9.3$  Hz, 1H), 6.74 (d,  $J = 8.4$  Hz, 1H), 5.90 (d, 2H).

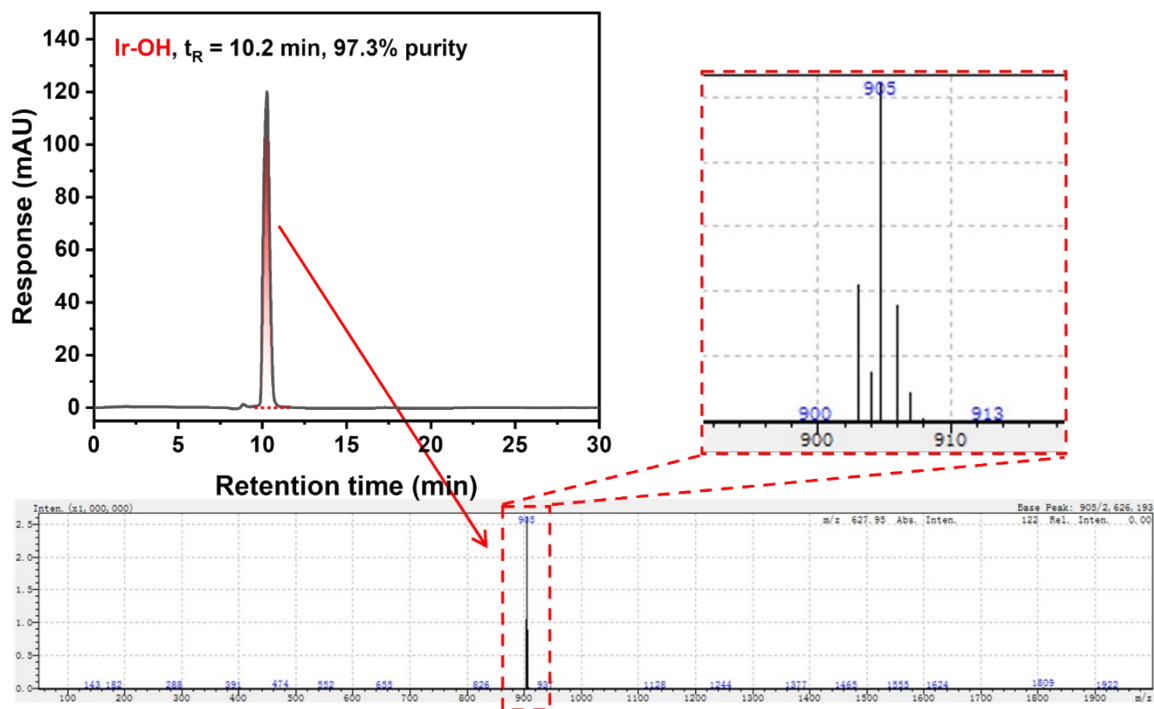

**Figure S5.** The purity of **Ir-OH** detected by LC-MS (top) and its relative mass spectrogram (bottom). The enlarged part showed the amplified mass spectrogram of **Ir-OH**.



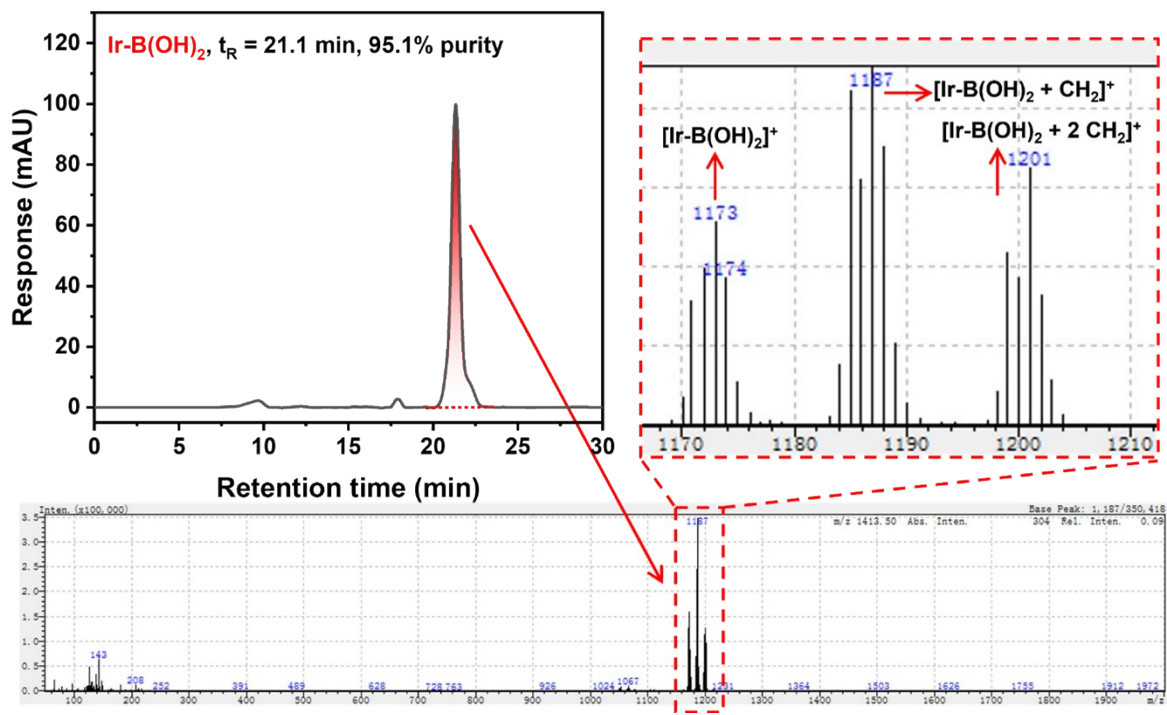

**Figure S6.** The purity of Ir-B(OH)<sub>2</sub> detected by LC-MS (top) and its relative mass spectrogram (bottom). The enlarged part of the mass spectrogram indicated that the mono-, di, and tri-methyl boronic ester had been formed under the testing condition with CH<sub>3</sub>OH.

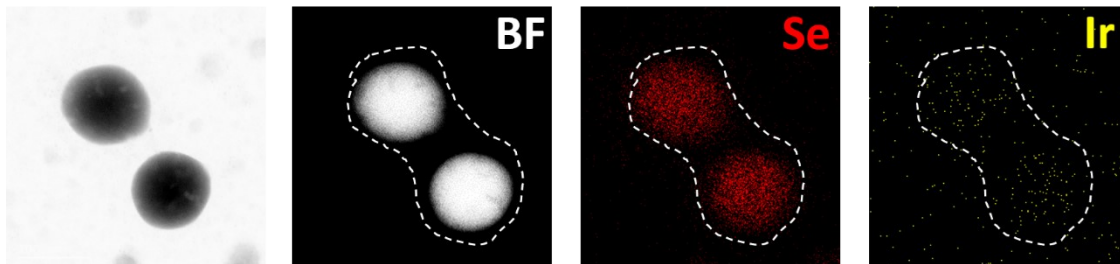

**Figure S7.** Elemental mapping of Ir@SeNPs with the elements Ir or Se marked in different colors.

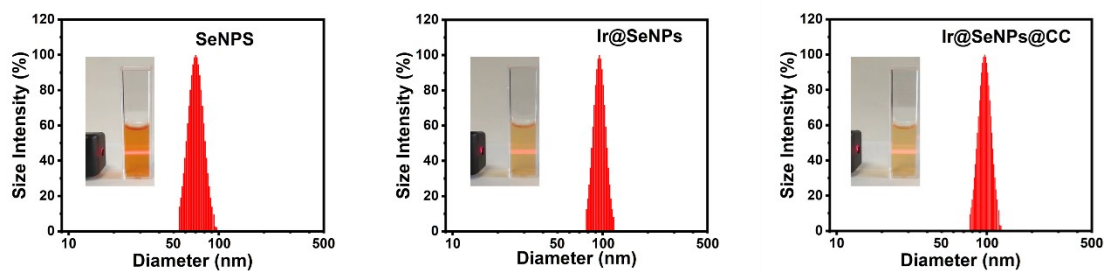

**Figure S8.** Size distribution of **SeNPs** ( $76.3 \pm 16.8$  nm), **Ir@SeNPs** ( $92.4 \pm 17.3$  nm), and **Ir@SeNPs@CC** ( $99.2 \pm 20.0$  nm) determined by dynamic light scattering.

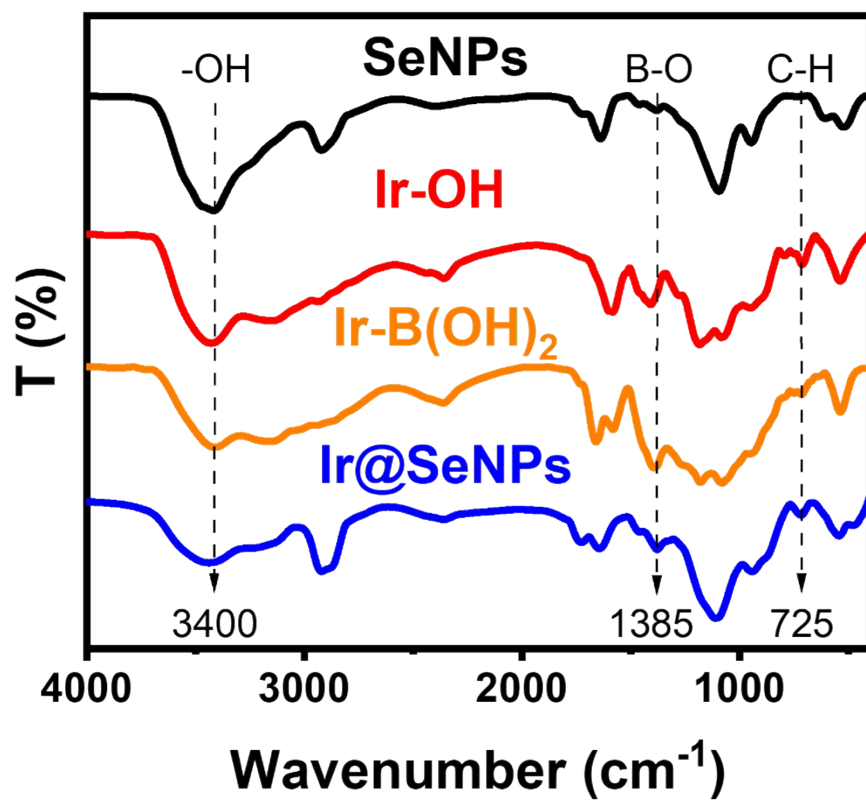

Figure S9. FTIR spectra of SeNPs, Ir-OH, Ir-B(OH)<sub>2</sub>, and Ir@SeNPs.

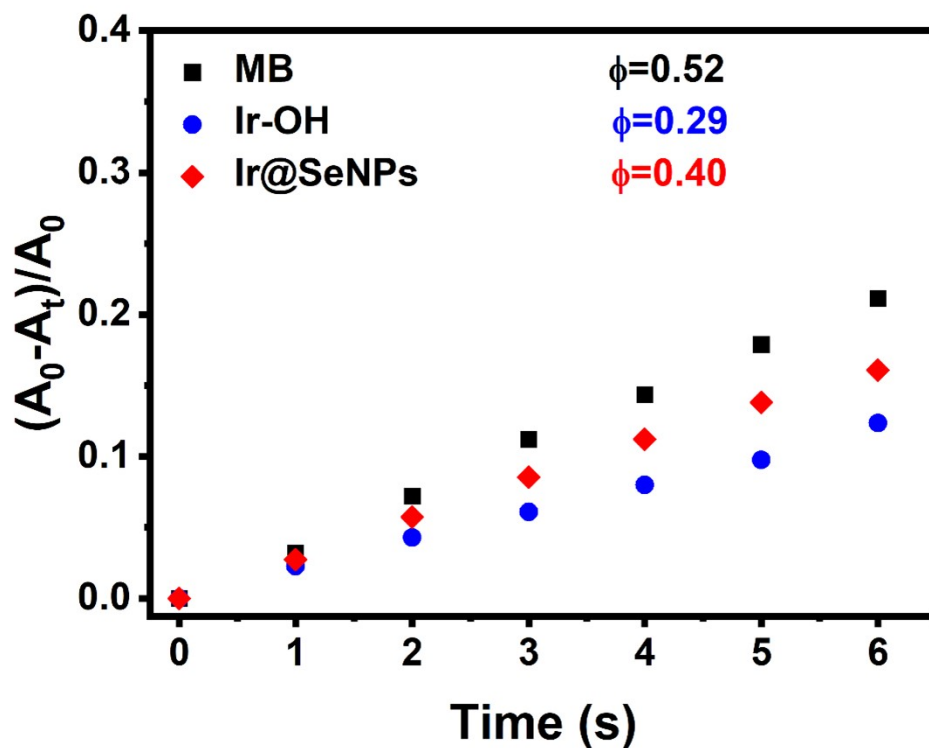

**Figure S10.** Change in absorption of DPBF at 410 nm upon incubation with Ir-OH, Ir@SeNPs and Methylene blue (MB) ( $OD_{405\text{ nm}} = 0.12$ ) and exposure to light irradiation (405 nm,  $20\text{ mW cm}^{-2}$ ).  $\phi$  represented corresponds to the singlet oxygen quantum yield.

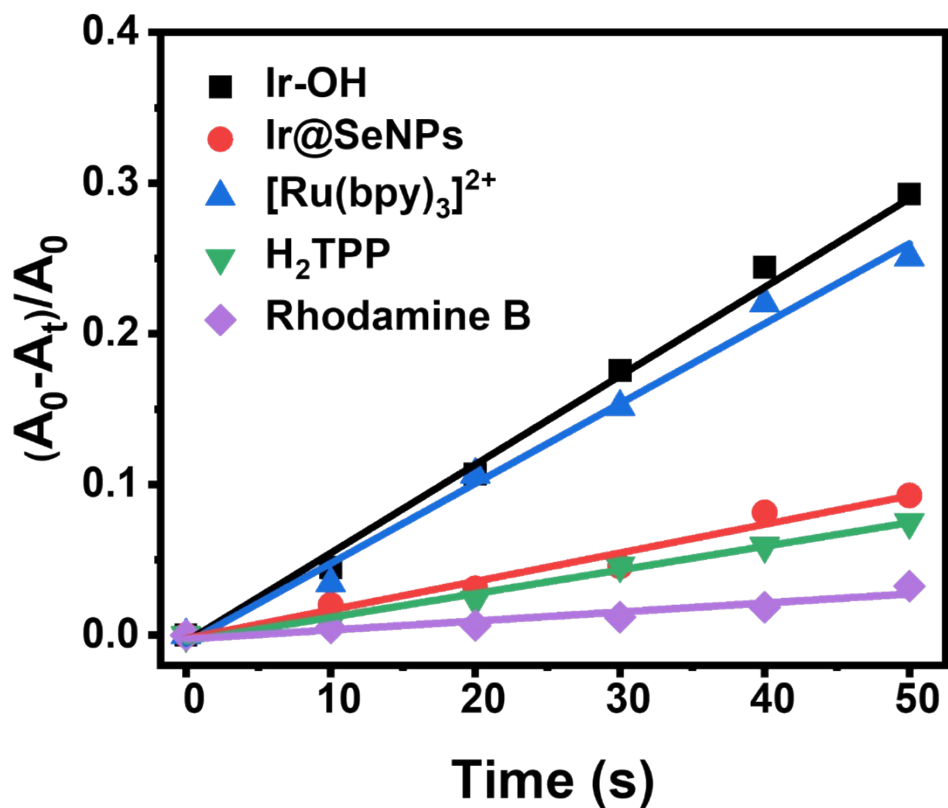

**Figure S11.** Change in absorption of DPBF at 410 nm upon incubation with Ir-OH, Ir@SeNPs, [Ru(bpy)<sub>3</sub>]<sup>2+</sup>, H<sub>2</sub>TPP and Rhodamine B (OD<sub>405 nm</sub> = 0.12) under two-photon light irradiation (405 nm, 50 mW) for different time intervals. The line corresponded to the compounds' linear fitting curves.

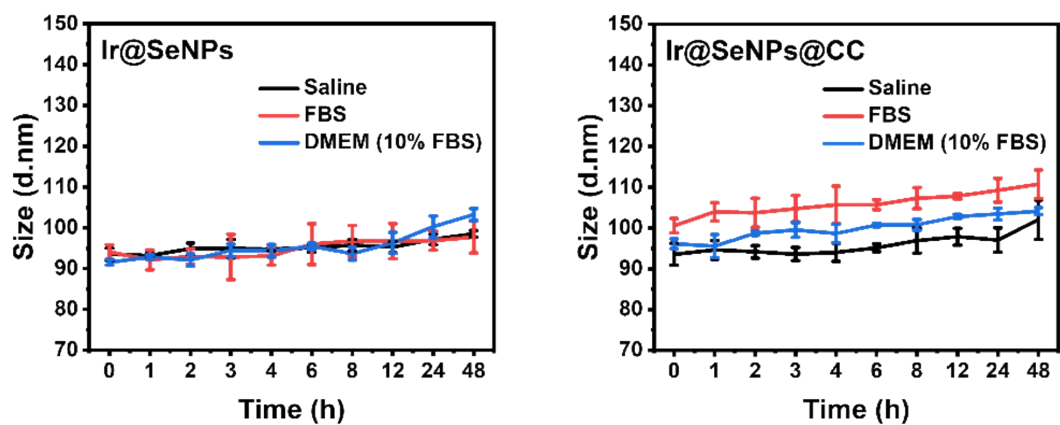

**Figure S12.** Monitoring of the hydrodynamic diameter of Ir@SeNPs and Ir@SeNPs@CC in saline, FBS or DMEM supplemented with 10% FBS from 0-48 h.

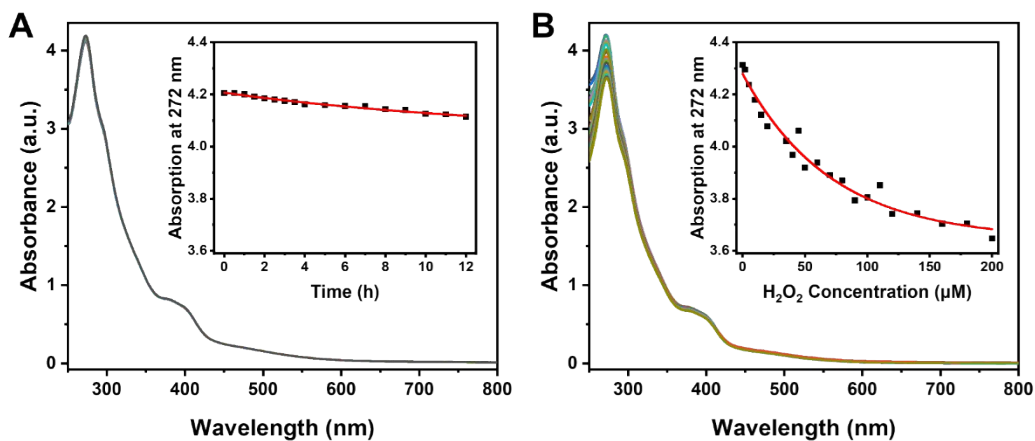

**Figure S13.** (A) Changes of the absorption of Ir@SeNPs ( $[Ir] = 20 \mu\text{M}$ ) in the absence of  $\text{H}_2\text{O}_2$  in PBS/ $\text{CH}_3\text{OH}$  (9/1, v/v) from 0-12 h, inset: changes of absorption at 272 nm. (B) Changes in the absorption of Ir@SeNPs ( $[Ir] = 20 \mu\text{M}$ ) upon treatment with  $\text{H}_2\text{O}_2$  in PBS/ $\text{CH}_3\text{OH}$  (9/1, v/v) from 0-200  $\mu\text{M}$   $\text{H}_2\text{O}_2$ , inset: changes of absorption at 272 nm.



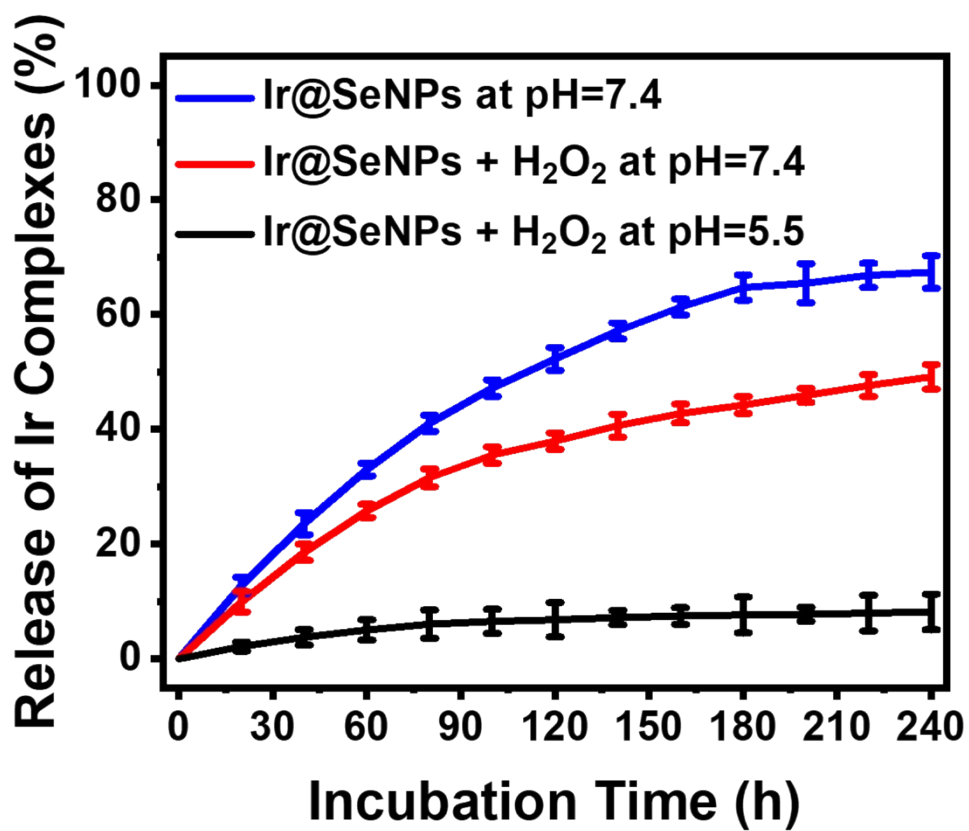

**Figure S14.** Release kinetics of Ir@SeNPs ([Ir] = 20  $\mu$ M) at pH=7.4, pH=7.4 + 100  $\mu$ M H<sub>2</sub>O<sub>2</sub>, or pH=5.5 + 100  $\mu$ M H<sub>2</sub>O<sub>2</sub> measured by ICP-MS (n = 3).

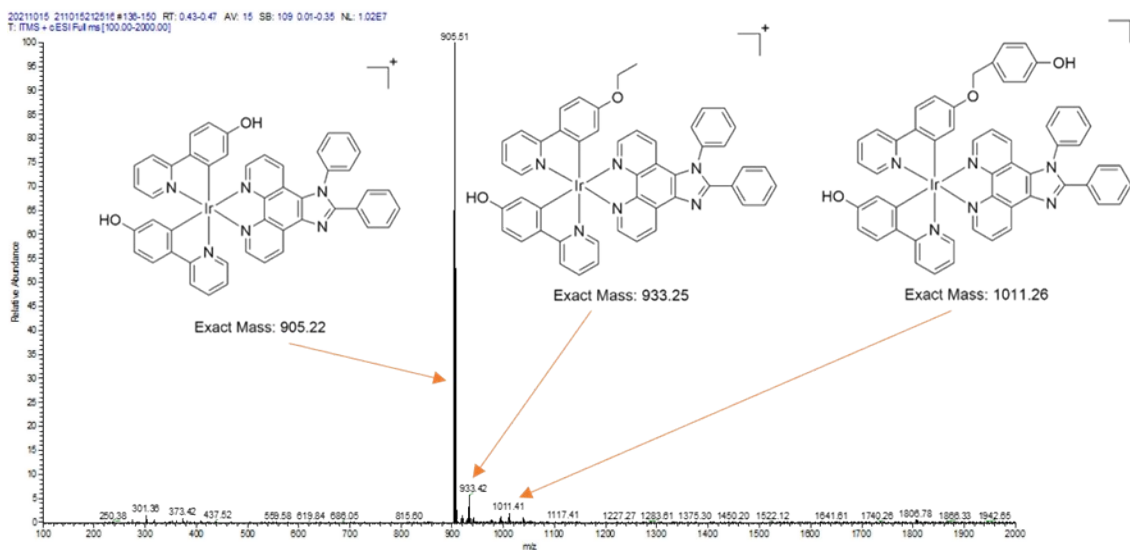

**Figure S15.** ESI-MS spectrum of the treatment of Ir@SeNPs with H<sub>2</sub>O<sub>2</sub> under acidic condition (pH=5.5) for 24 h.

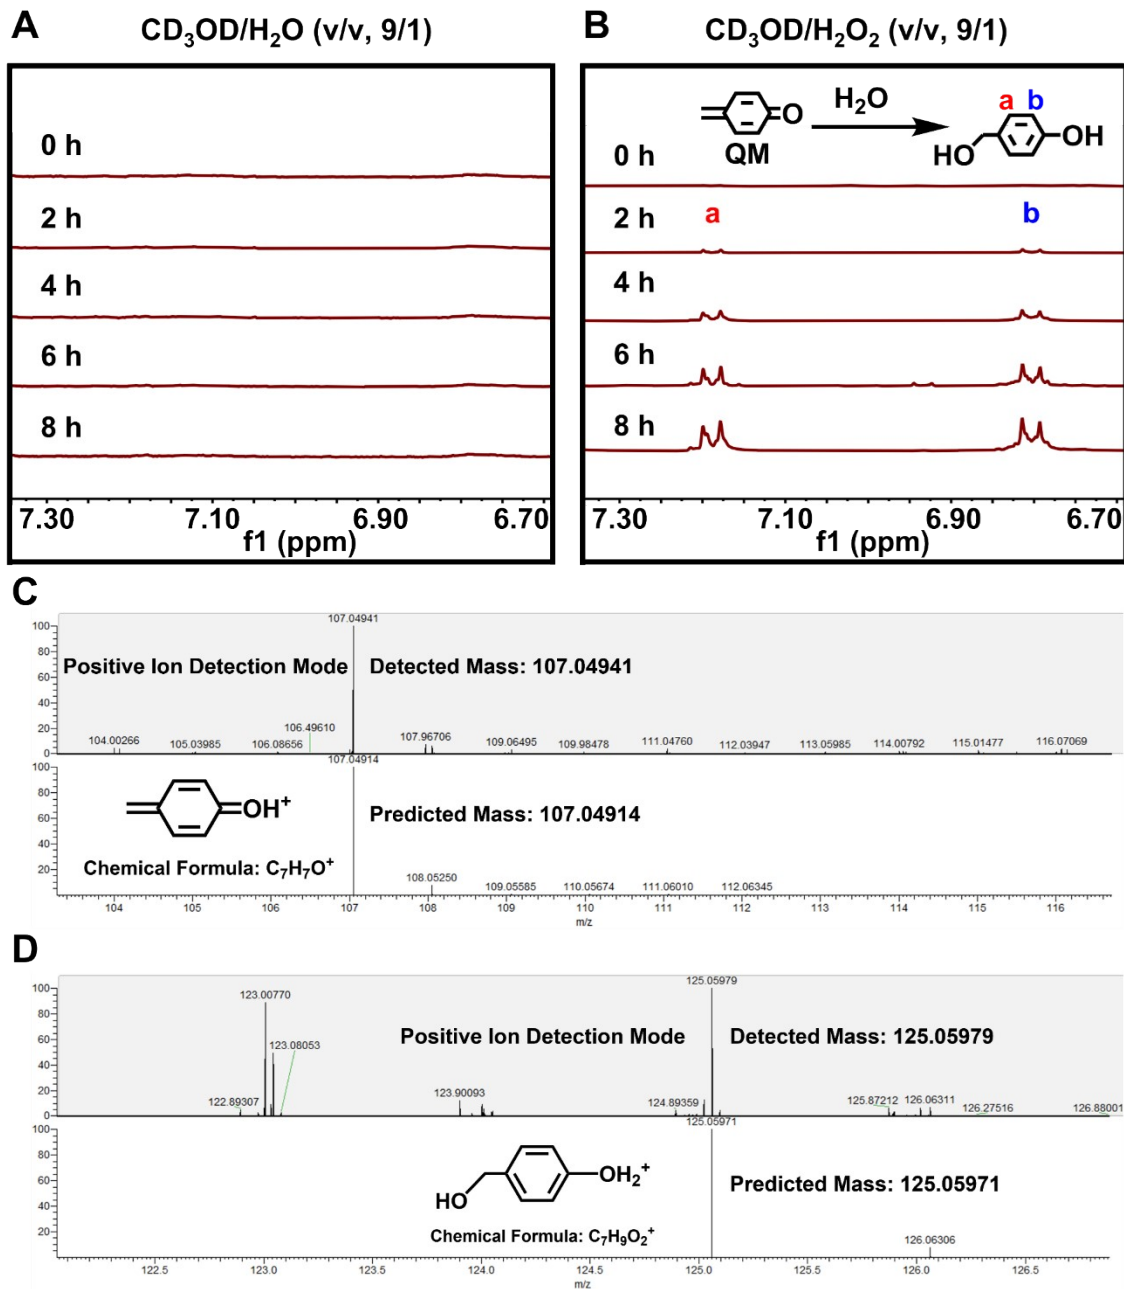

**Figure S16.** Changes in the  $^1\text{H}$ -NMR spectra upon incubation of  $\text{Ir@SeNPs}$  with  $\text{H}_2\text{O}$  (A) or  $\text{H}_2\text{O}_2$  (B) in  $\text{CD}_3\text{OD}$  for various time intervals. HRMS detection of methylquinone (C) and its hydrolysis form (D).

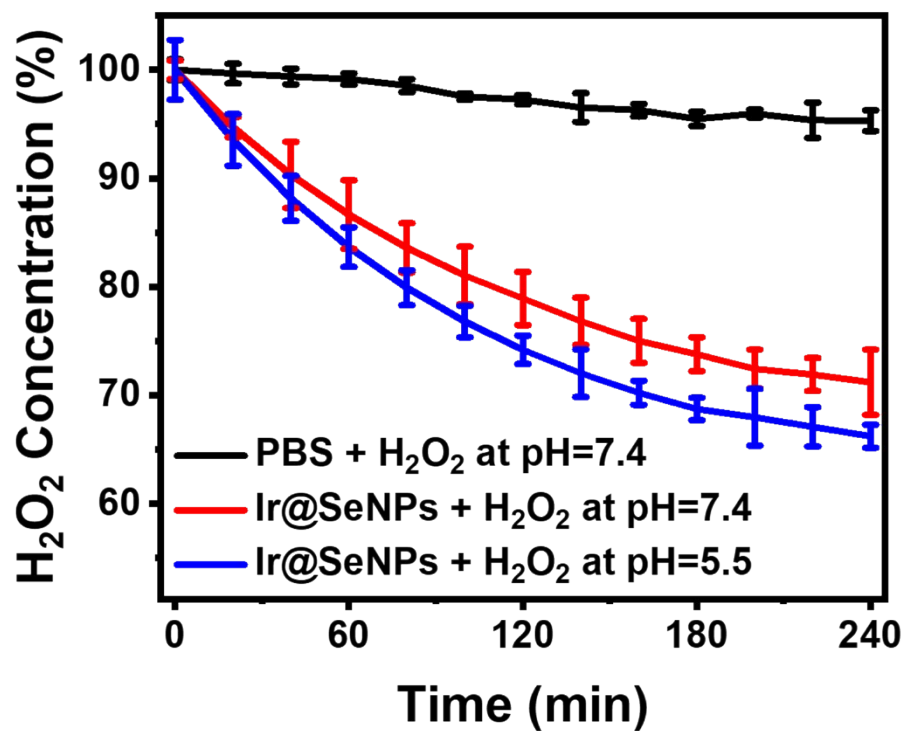

**Figure S17.** Degradation of H<sub>2</sub>O<sub>2</sub> (100 μM) in the presence of Ir@SeNPs ([Ir] = 20 μM) under different treatments from 0-240 min (n = 3).

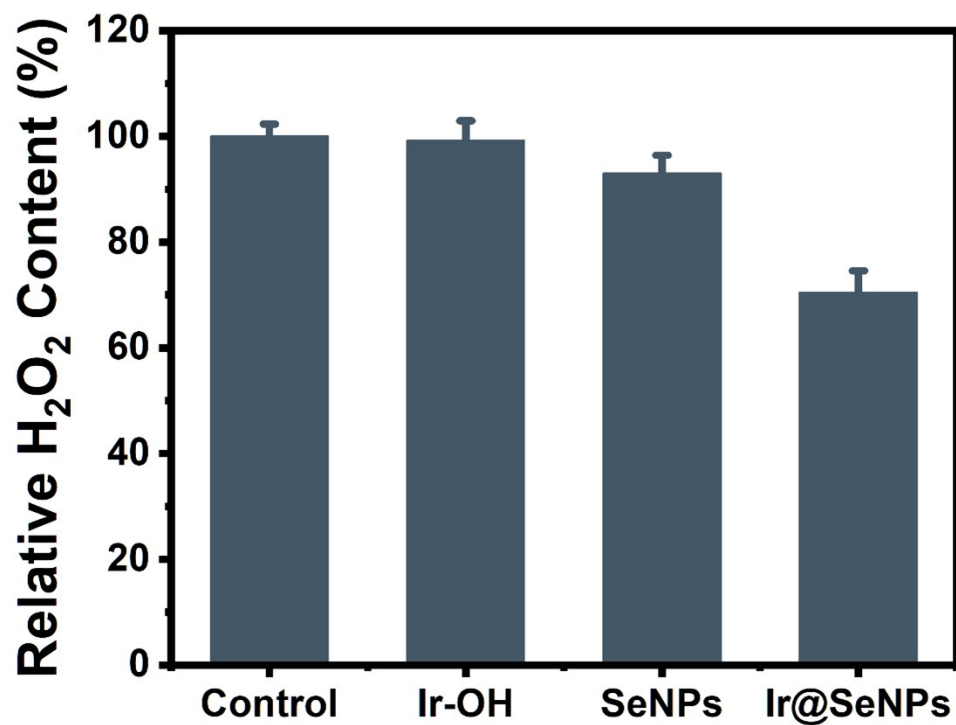

**Figure S18.** Relative intracellular H<sub>2</sub>O<sub>2</sub> levels of A375 cells upon treatment with Ir-OH, SeNPs, and Ir@SeNPs ([Ir] = 10  $\mu$ M, [Se] = 20  $\mu$ g mL<sup>-1</sup>).

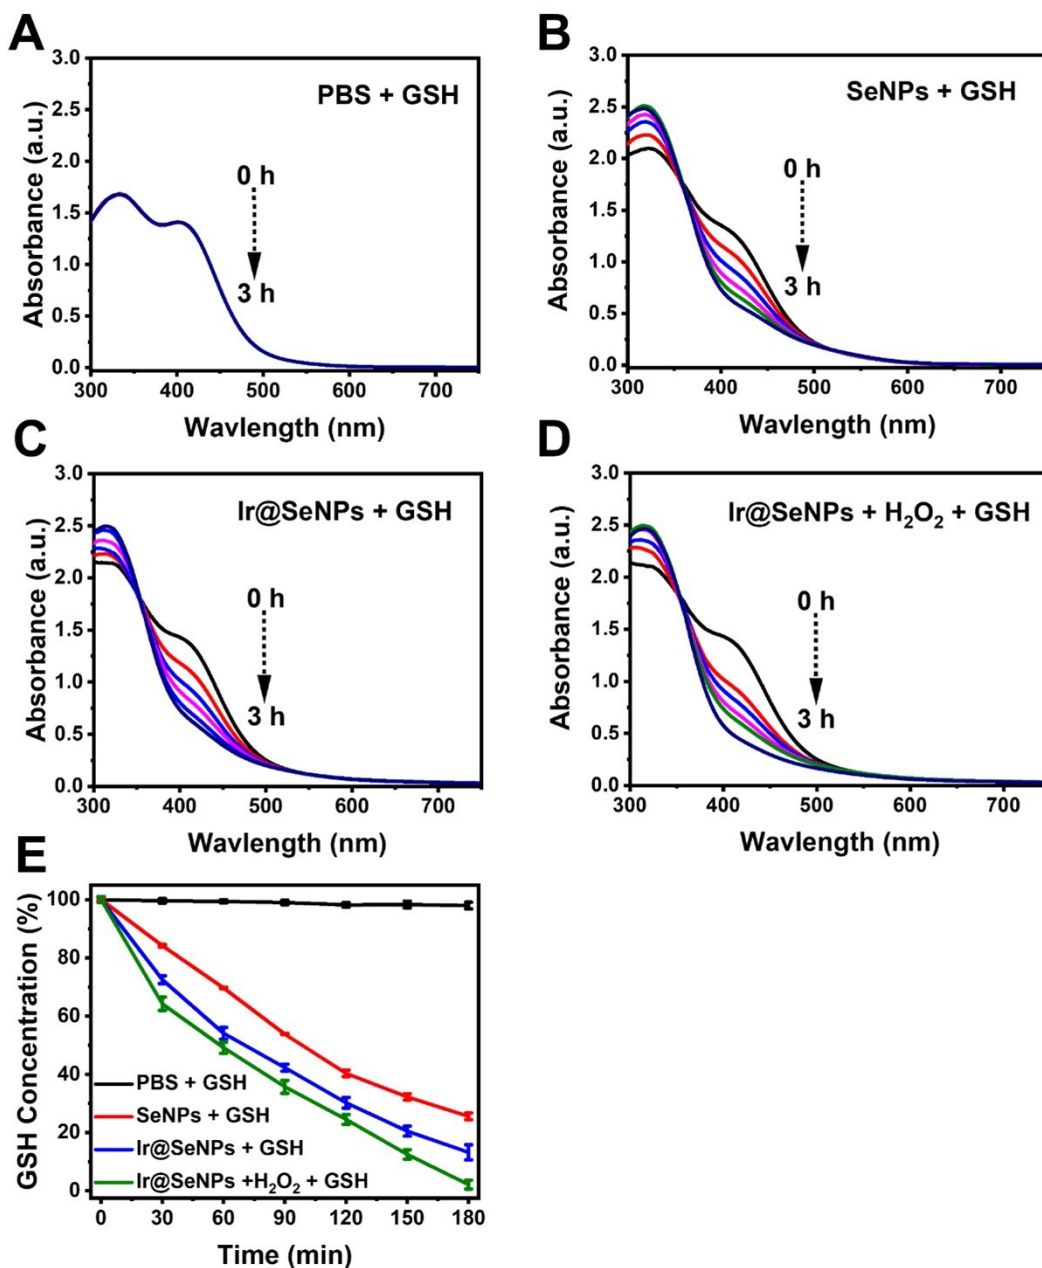

**Figure S19.** Time-dependent UV absorption spectra of the consumption of GSH (1.0 mM) using the GSH specific probe DTNB at 412 nm upon treatment with (A) PBS, (B) **SeNPs**, (C) **Ir@SeNPs**, and (D) **Ir@SeNPs** that were preincubated with H<sub>2</sub>O<sub>2</sub> (500  $\mu$ M) for 30 min ( $[Se] = 400 \mu\text{g mL}^{-1}$ ) from 0-3 h. Their GSH depletion (E) was quantified by using the UV absorption decrease at 412 nm ( $n=3$ ).

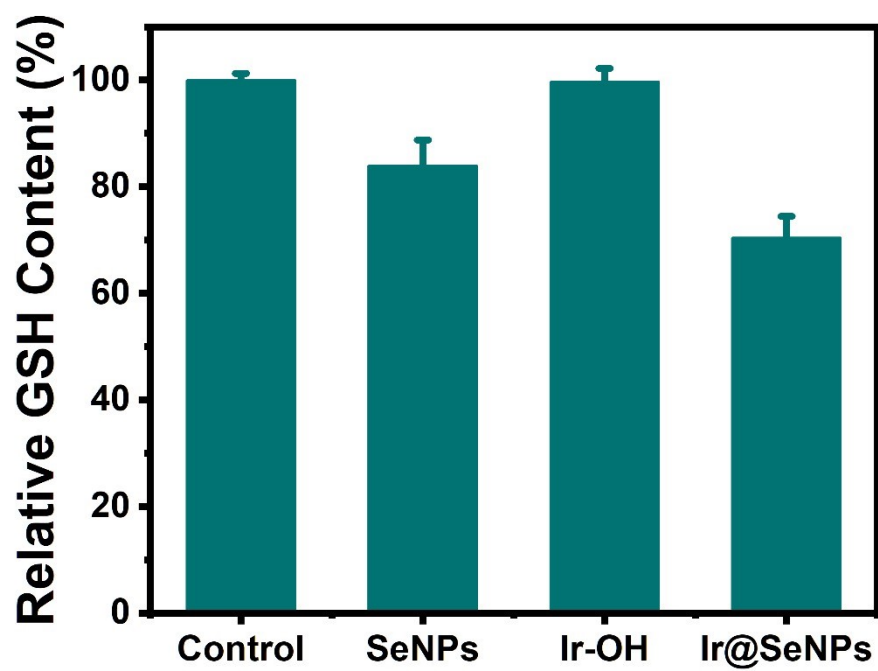

**Figure S20.** Relative intracellular GSH level of A375 cells upon treatment with Ir-OH, SeNPs, and Ir@SeNPs ( $[\text{Ir}] = 10 \mu\text{M}$ ,  $[\text{Se}] = 20 \mu\text{g mL}^{-1}$ ).

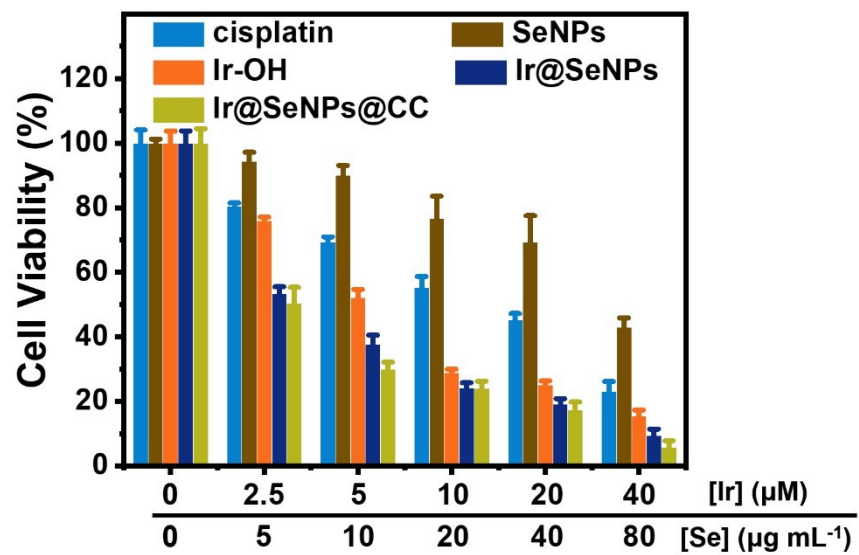

**Figure S21.** Cytotoxicity of A375 cells incubated with cisplatin, SeNPs, Ir-OH, Ir@SeNPs, and Ir@SeNPs@CC ([Ir] = 0-40 μM, [Se] = 0-80 μg mL<sup>-1</sup>) upon light irradiation (405 nm, 20 mW cm<sup>-2</sup>, 10 min) (n = 3).



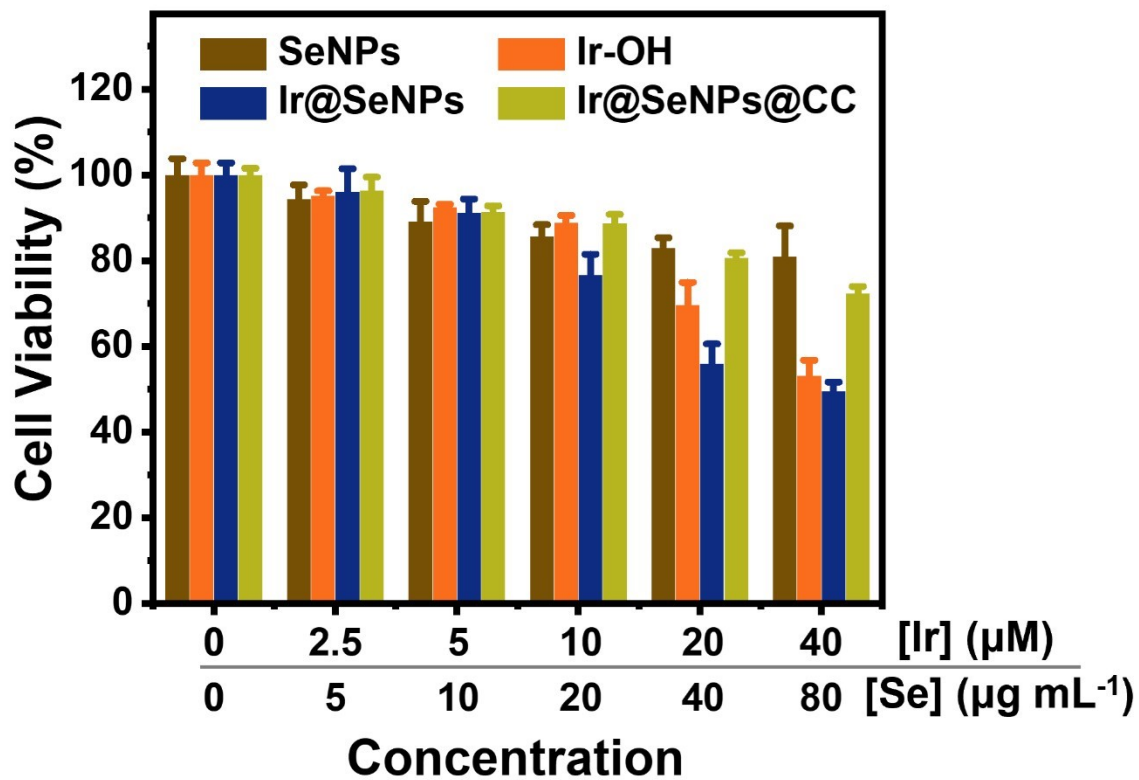

Figure S22. Dark cytotoxicity of L02 cells incubated with SeNPs, Ir-OH, Ir@SeNPs, and Ir@SeNPs@CC ([Ir] = 0-40 μM, [Se] = 0-80 μg mL<sup>-1</sup>).

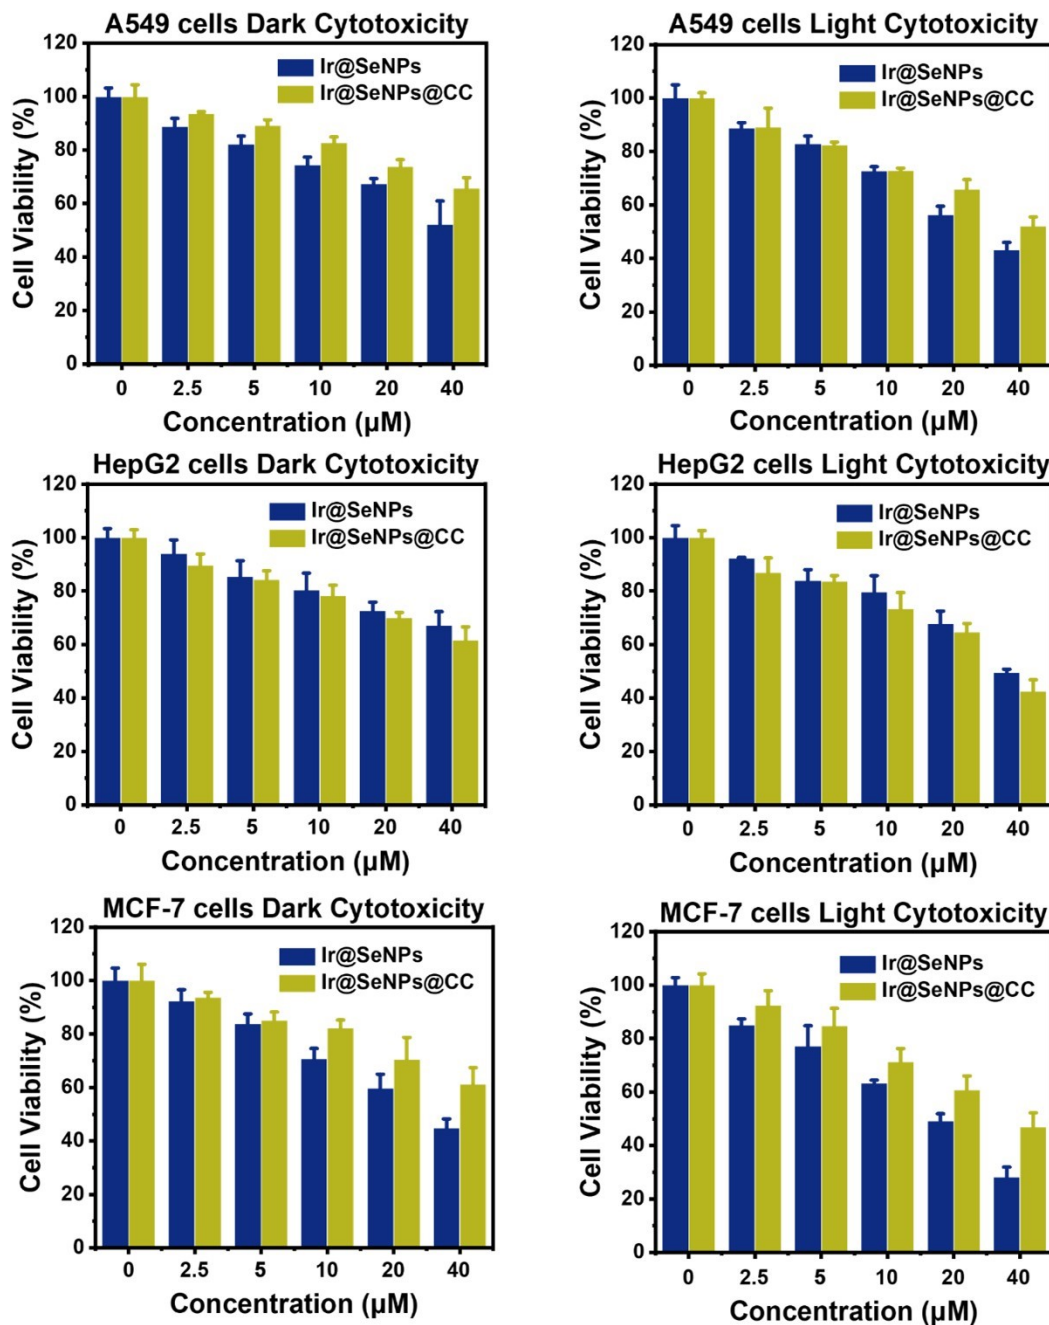

**Figure S23.** The cytotoxicity of Ir@SeNPs and Ir@SeNPs@CC ([Ir] = 0-40 μM, [Se] = 0-80 μg mL<sup>-1</sup>) towards A549 cells, HepG2 cells and MCF-7 cells under dark or light irradiation (405 nm, 10 mW cm<sup>-2</sup>, 10 min) (n = 3).

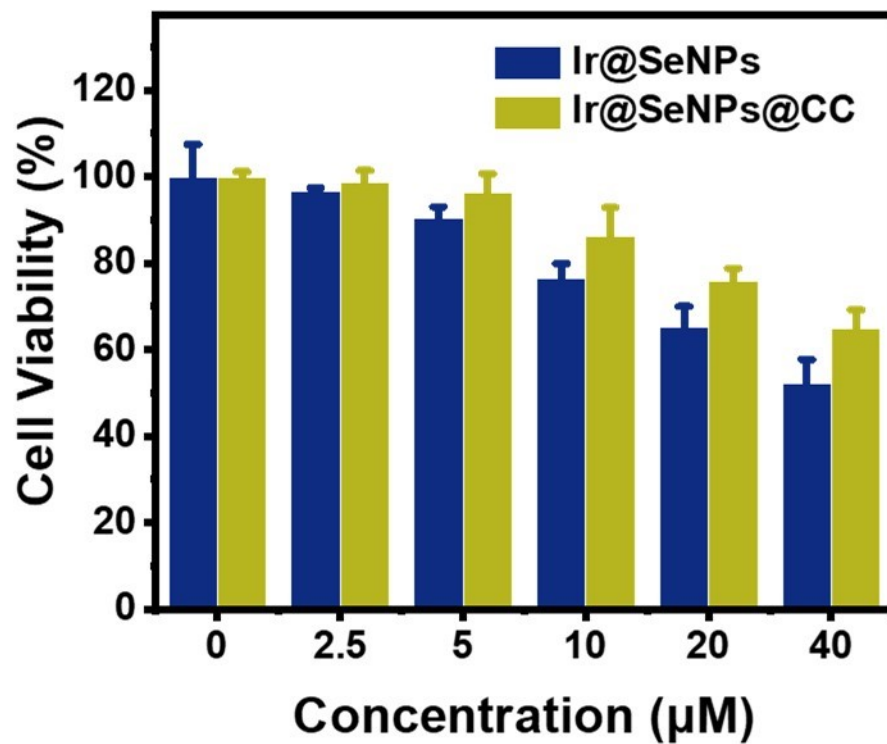

**Figure S24.** Dark cytotoxicity of RAW 264.7 cells incubated with Ir@SeNPs and Ir@SeNPs@CC ([Ir] = 0-40 µM).

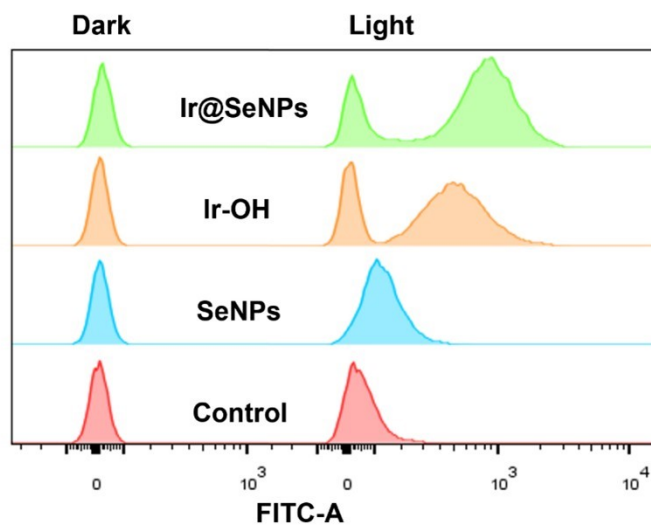

**Figure S25.** Flow cytometry analysis of A375 cells incubated with **Ir-OH**, **SeNPs**, and **Ir@SeNPs** ( $[\text{Ir}] = 20 \mu\text{M}$ ,  $[\text{Se}] = 40 \mu\text{g mL}^{-1}$ ) in dark or light irradiation (405 nm, 10 mW  $\text{cm}^{-2}$ , 10 min) and stained with DCFH-DA.

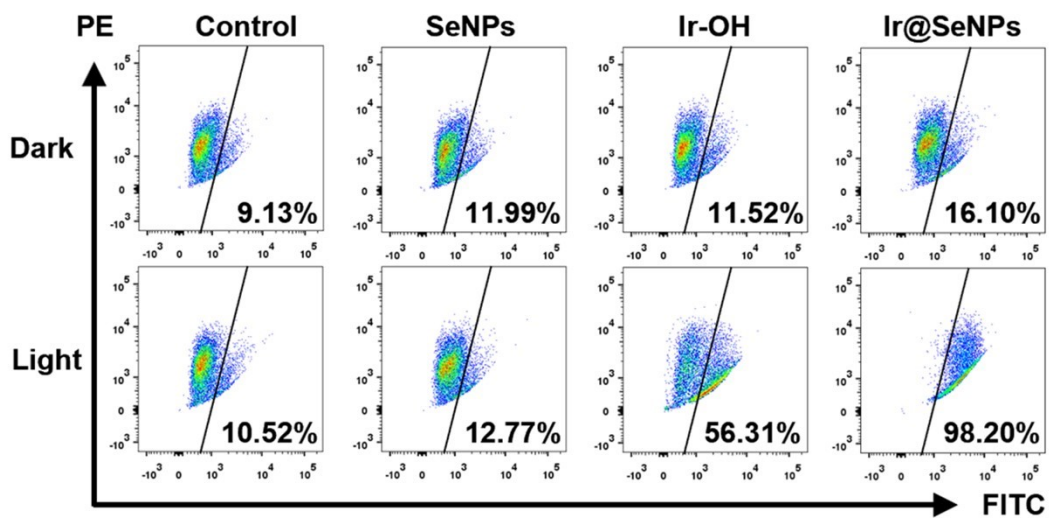

**Figure S26.** Flow cytometry analysis of A375 cells incubated with **Ir-OH**, **SeNPs**, and **Ir@SeNPs** ( $[Ir] = 20 \mu\text{M}$ ,  $[\text{Se}] = 40 \mu\text{g mL}^{-1}$ ) in dark or light irradiation (405 nm, 10 mW  $\text{cm}^{-2}$ , 10 min) and stained with the mitochondria membrane potential probe JC-1.

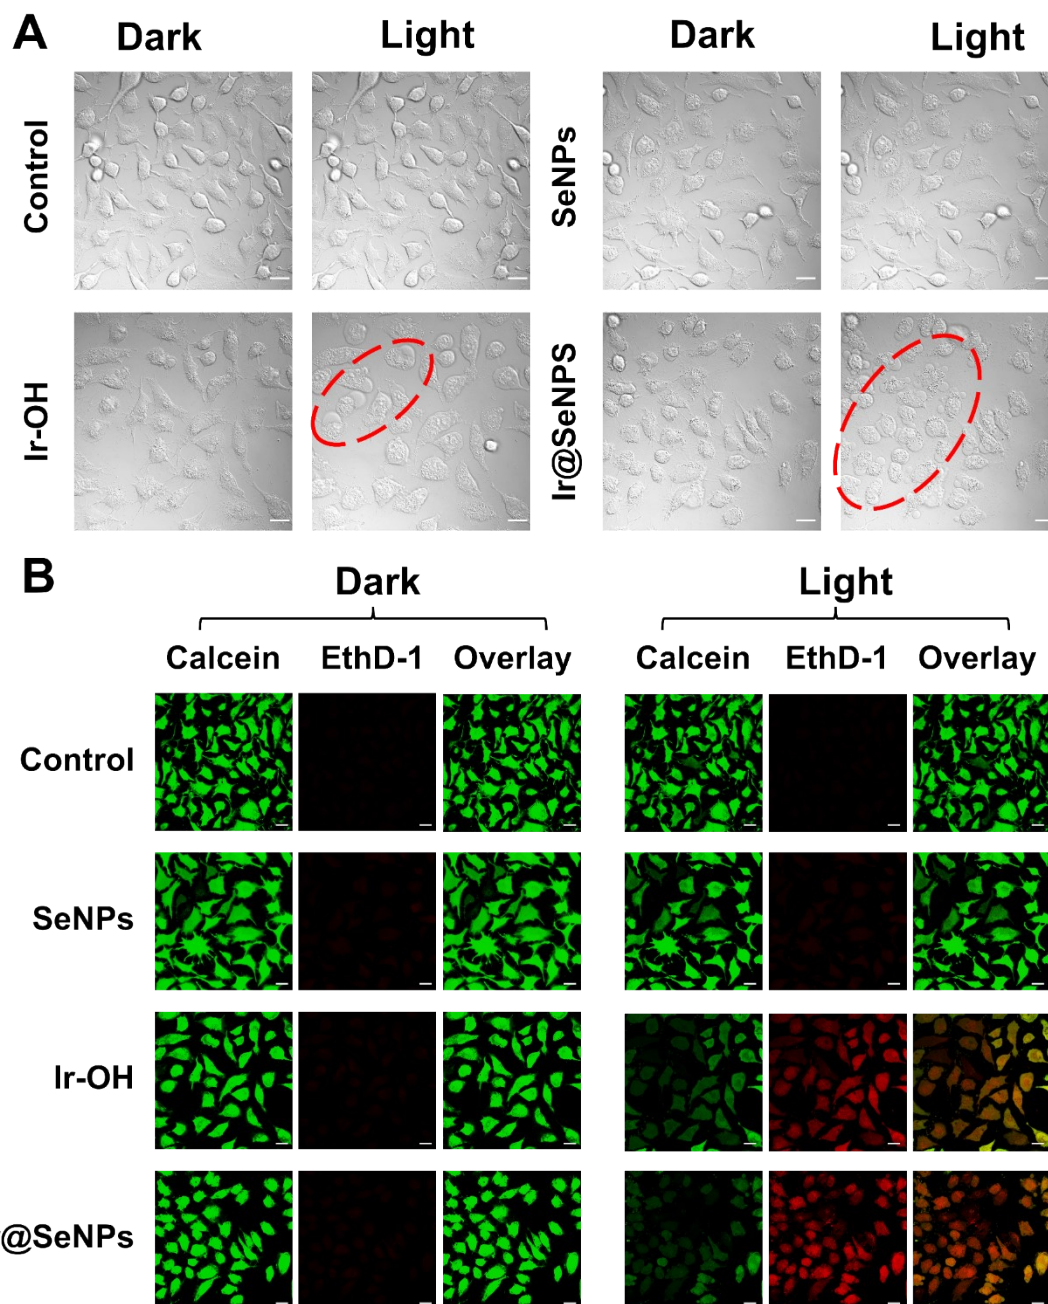

**Figure S27.** The morphology changes (A) of A375 cells incubated with Ir-OH, SeNPs, and Ir@SeNPs ([Ir] = 20  $\mu$ M, [Se] = 40  $\mu$ g mL<sup>-1</sup>) before and after two-photon irradiation (730 nm, 20 mW, 5 min), and the relative live (Calcein-AM, green)/death (EthD-1, red) staining (B). Scale bar: 20  $\mu$ m.

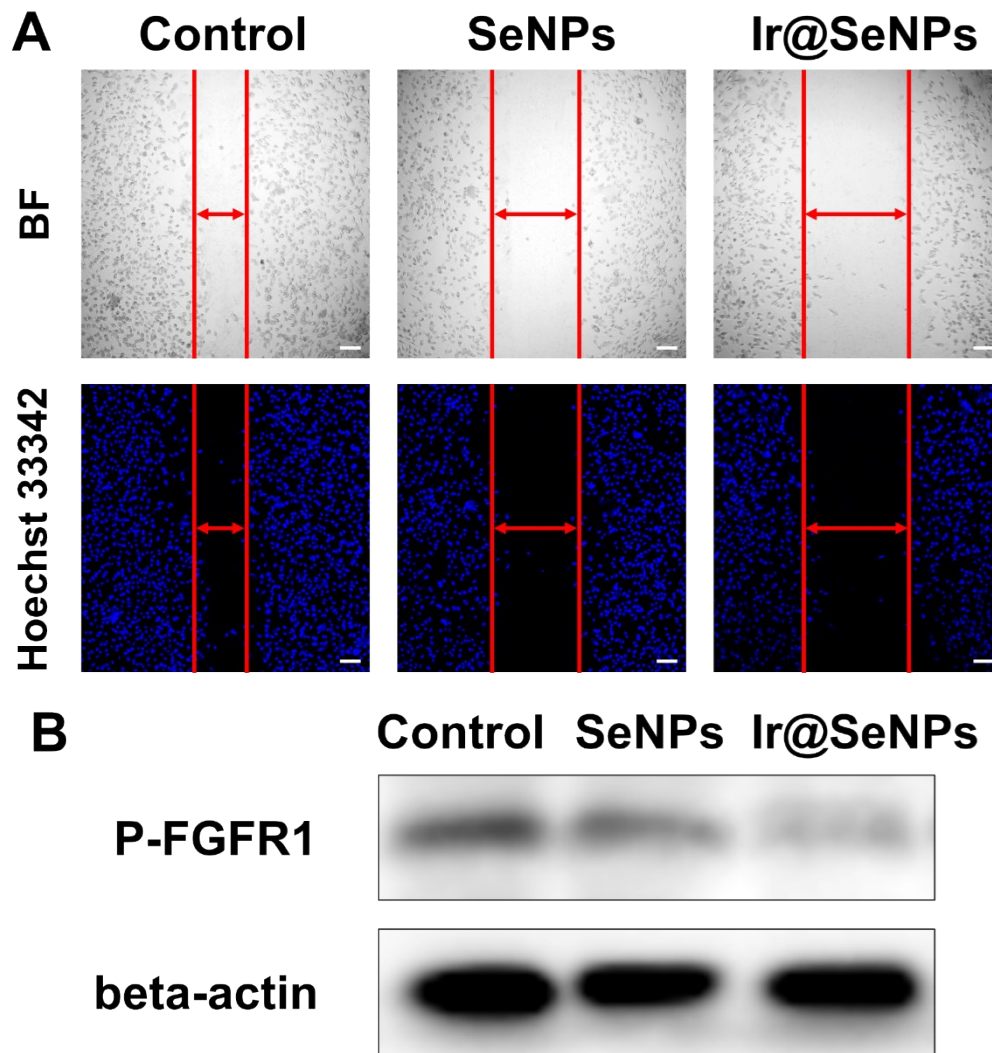

**Figure S28.** (A) Effects of **SeNPs** or **Ir@SeNPs** on A375 cells migration in wound migration assays (top: bright field, bottom: Hoechst 33342 stained). Scale bar: 20  $\mu\text{m}$ . Cells were wounded with pipette in the absence or presence of **SeNPs** or **Ir@SeNPs** ( $[\text{Se}] = 20 \mu\text{g mL}^{-1}$ ). Scale bar: 100  $\mu\text{m}$ . (B) Effect of **SeNPs** or **Ir@SeNPs** ( $[\text{Se}] = 20 \mu\text{g mL}^{-1}$ ) on the expression of phosphorylation of FGFR1 was determined by immunoblotting after 24 h treatment of A375 cells. Beta-actin was detected as a loading control.

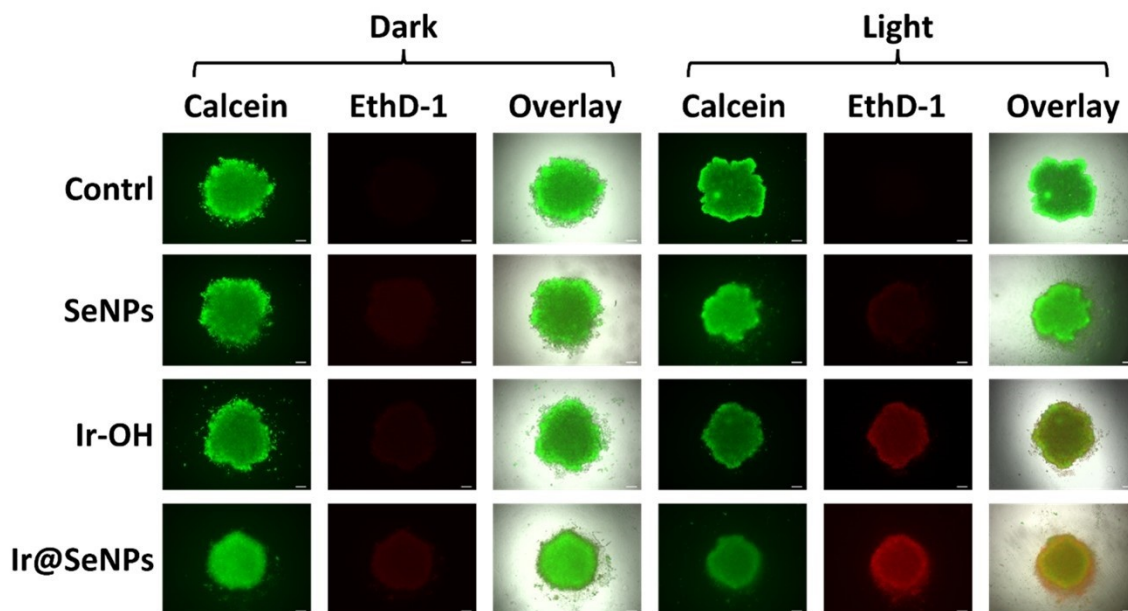

**Figure S29.** Fluorescence microscopy images of A375 MCTS incubated with **SeNPs**, **Ir-OH**, and **Ir@SeNPs** ( $[\text{Ir}] = 20 \mu\text{M}$ ,  $[\text{Se}] = 40 \mu\text{g mL}^{-1}$ ) upon treatment in the dark or exposure to two-photon irradiation (730 nm, 20 mW, 5 min). The MCTS were stained with Calcein-AM/EthD-1 (Calcein-AM is a stain for living cells,  $2 \mu\text{M}$ ,  $\lambda_{\text{ex}} = 488 \text{ nm}$ ,  $\lambda_{\text{em}} = 510 \pm 10 \text{ nm}$ ; EthD-1 is a stain for dead cells,  $4 \mu\text{M}$ ,  $\lambda_{\text{ex}} = 543 \text{ nm}$ ,  $\lambda_{\text{em}} = 610 \pm 10 \text{ nm}$ ). Scale bar = 100  $\mu\text{m}$ .



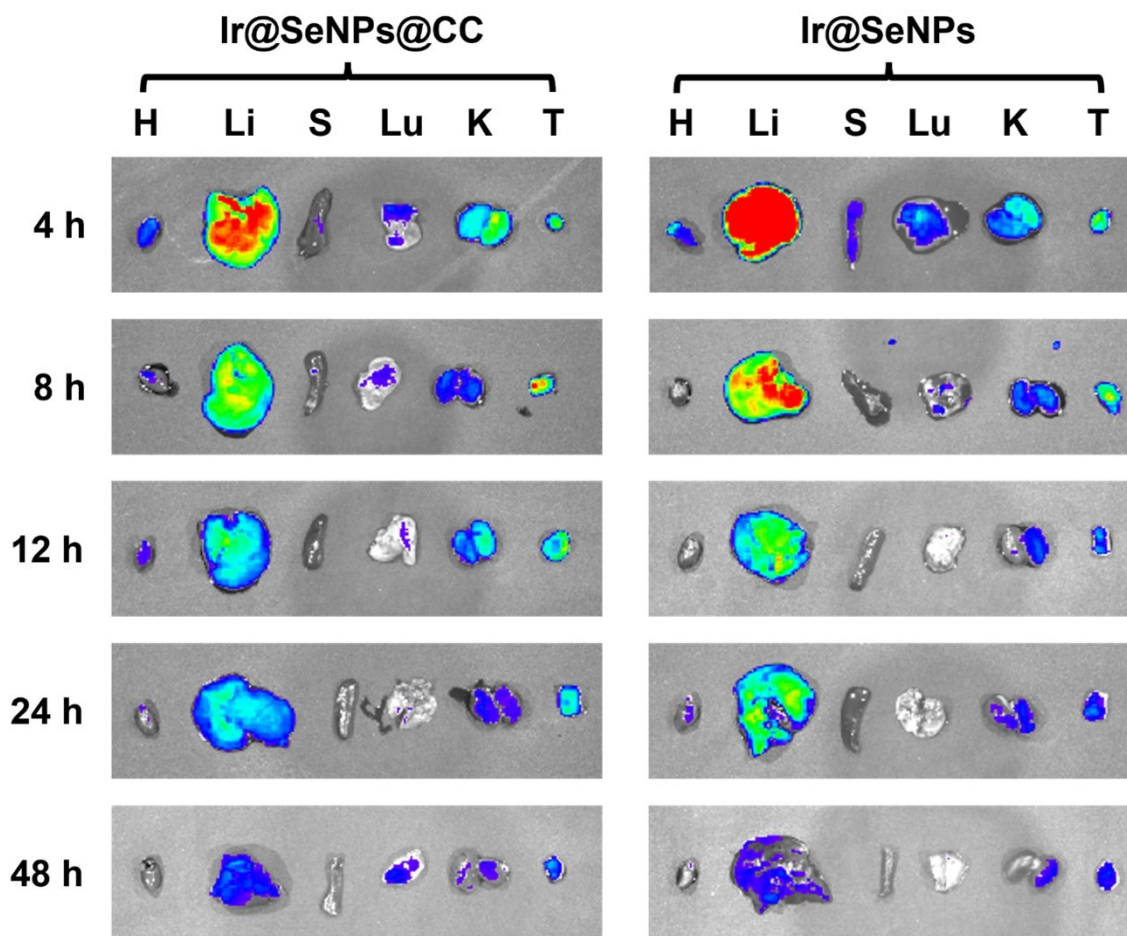

**Figure S30.** Fluorescence images of the major organs of A375 tumor-bearing mice models after injection with  $\text{Ir@SeNPs@CC}$  or  $\text{Ir@SeNPs}$  ( $5 \text{ mg kg}^{-1}$ ) for different periods. H: heart, Li: liver, S: spleen, Lu: lung, K: kidneys, T: tumor.  $\lambda_{\text{ex}} = 430 \text{ nm}$ ,  $\lambda_{\text{em}} = 610 \text{ nm}$ .

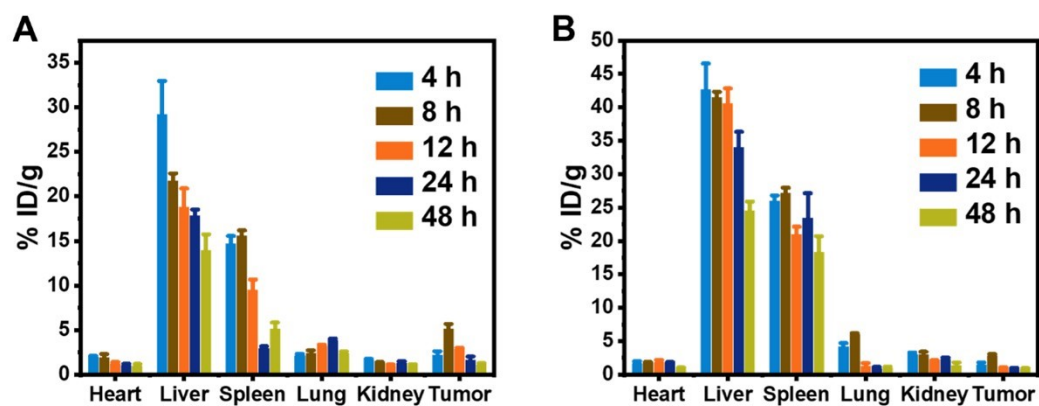

**Figure S31.** Biodistribution of (A) Ir@NPs@CC or (B) Ir@SeNPs in major organs and tumors 4, 8, 12, 24 or 48 h after the administration upon determination of the iridium concentration by ICP-MS (n = 3).

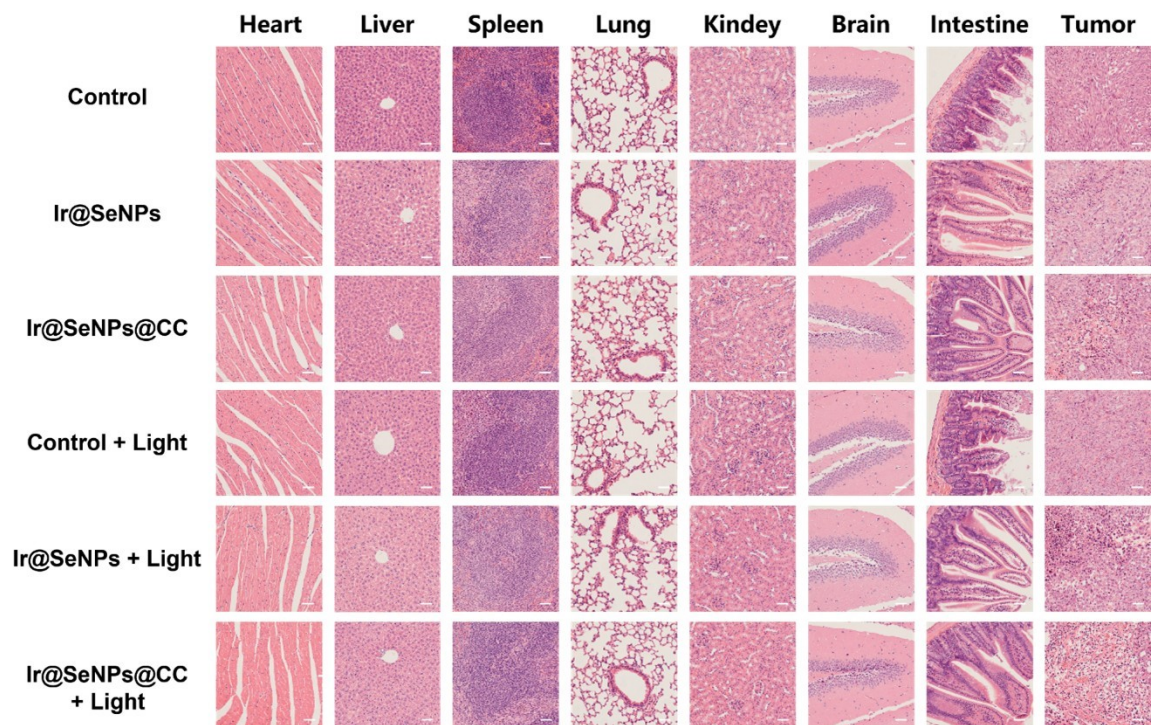

**Figure S32.** Representative H&E stained histopathologic slices of the major organs and tumors of A375 tumor xenograft mice after various treatments. Light irradiation ( $\lambda_{ex} = 730$  nm, 50 mW, 5 min). Scale bars: 50  $\mu$ m.

**Table S1.** Cytotoxicity towards different cell lines upon 405 nm light irradiation or left in dark (10 mw: 10 mW cm<sup>-2</sup>, 10 min; 20 mw: 20 mW cm<sup>-2</sup>, 10 min; PI: photocytotoxicity index) (n = 3).

| Compound<br>s                                      |               | IC <sub>50</sub> |                |                |                |                       |                |
|----------------------------------------------------|---------------|------------------|----------------|----------------|----------------|-----------------------|----------------|
|                                                    |               | A375<br>cells    | A549<br>cells  | HepG2<br>cells | MCF-7<br>cells | RAW<br>264.7<br>cells | L02<br>cells   |
| cisplatin<br>( $\mu\text{M}$ )                     | Dark          | 13.2 $\pm$ 0.3   | -              | -              | -              | -                     | -              |
|                                                    | Light (10 mW) | 13.6 $\pm$ 0.6   | -              | -              | -              | -                     | -              |
|                                                    | PI            | 1.0              | -              | -              | -              | -                     | -              |
|                                                    | Light (20 mW) | 13.0 $\pm$ 0.5   | -              | -              | -              | -                     | -              |
|                                                    | PI            | 1.0              | -              | -              | -              | -                     | -              |
| <b>SeNPs</b><br>( $\mu\text{g mL}^{-1}$ )          | Dark          | 81.0 $\pm$ 1.2   | -              | -              | -              | -                     | 300 $\pm$ 5.5  |
|                                                    | Light (10 mW) | 77.0 $\pm$ 0.2   | -              | -              | -              | -                     | -              |
|                                                    | PI            | 1.0              | -              | -              | -              | -                     | -              |
|                                                    | Light (20 mW) | 79.6 $\pm$ 0.8   | -              | -              | -              | -                     | -              |
|                                                    | PI            | 1.0              | -              | -              | -              | -                     | -              |
| <b>Ir-OH</b><br>( $\mu\text{M}$ )                  | Dark          | 38.3 $\pm$ 0.9   | -              | -              | -              | -                     | 100 $\pm$ 5.4  |
|                                                    | Light (10 mW) | 13.2 $\pm$ 0.3   | -              | -              | -              | -                     | -              |
|                                                    | PI            | 2.9              | -              | -              | -              | -                     | -              |
|                                                    | Light (20 mW) | 6.0 $\pm$ 0.5    | -              | -              | -              | -                     | -              |
|                                                    | PI            | 6.3              | -              | -              | -              | -                     | -              |
| <b>Ir@SeNPs</b><br>( $\mu\text{M}$ )               | Dark          | 31.0 $\pm$ 1.0   | 49.4 $\pm$ 0.5 | 87.7 $\pm$ 0.7 | 30.0 $\pm$ 0.8 | 27.8 $\pm$ 3.2        | 32.6 $\pm$ 2.6 |
|                                                    | Light (10 mW) | 7.5 $\pm$ 0.5    | 29.0 $\pm$ 0.6 | 43.0 $\pm$ 1.0 | 17.0 $\pm$ 1.0 | -                     | -              |
|                                                    | PI            | 4.1              | 1.7            | 2.0            | 1.7            | -                     | -              |
|                                                    | Light (20 mW) | 3.0 $\pm$ 0.6    | -              | -              | -              | -                     | -              |
|                                                    | PI            | 10.3             | -              | -              | -              | -                     | -              |
| <b>Ir@SeNPs</b><br><b>@CC</b><br>( $\mu\text{M}$ ) | Dark          | 30 $\pm$ 1.8     | 87.0 $\pm$ 1.0 | 84.2 $\pm$ 1.0 | 66.0 $\pm$ 0.2 | 40.2 $\pm$ 2.8        | 120 $\pm$ 8.4  |
|                                                    | Light (10 mW) | 4.4 $\pm$ 0.9    | 47.0 $\pm$ 1.0 | 34.8 $\pm$ 0.5 | 31.8 $\pm$ 0.8 | -                     | -              |
|                                                    | PI            | 6.8              | 1.8            | 2.4            | 2.0            | -                     | -              |
|                                                    | Light (20 mW) | 2.3 $\pm$ 0.2    | -              | -              | -              | -                     | -              |
|                                                    | PI            | 13.3             | -              | -              | -              | -                     | -              |

**Table S2.** Cytotoxicity towards A375 MCTS upon 730 nm two-photon light irradiation (730 nm, 20 mW, 5 min) or left in dark (PI: photocytotoxicity index) (n=3).

| Compounds                                 |       | IC <sub>50</sub> |
|-------------------------------------------|-------|------------------|
|                                           |       | A375 MCTS        |
| <b>SeNPs</b><br>( $\mu\text{g mL}^{-1}$ ) | Dark  | 105 $\pm$ 6.0    |
|                                           | Light | 97.0 $\pm$ 9.2   |
|                                           | PI    | 1.0              |
| <b>Ir-OH</b><br>( $\mu\text{M}$ )         | Dark  | 70.0 $\pm$ 5.0   |
|                                           | Light | 35.3 $\pm$ 2.0   |
|                                           | PI    | 2.0              |
| <b>Ir@SeNPs</b><br>( $\mu\text{M}$ )      | Dark  | 52.0 $\pm$ 2.2   |
|                                           | Light | 19.2 $\pm$ 1.4   |
|                                           | PI    | 2.7              |
| <b>Ir@SeNPs@CC</b><br>( $\mu\text{M}$ )   | Dark  | 45.3 $\pm$ 3.8   |
|                                           | Light | 10 $\pm$ 1.9     |
|                                           | PI    | 4.5              |
